# Supplementary material for: DrugScorePPI Knowledge-Based Potentials Used as Scoring and Objective Function in Protein-Protein Docking
Source: PubMed Central journal article supplement (PMC3931789; doi:10.1371/journal.pone.0089466), 2014-02-21
Supplement: pone.0089466.s001.pdf [file pone.0089466.s001.pdf]

## Supporting Information

# DrugScore<sup>PPI</sup> Knowledge-Based Potentials Used as Scoring and Objective Function in Protein-Protein Docking

Dennis M. Krüger<sup>1</sup>, José Ignacio Garzón<sup>2</sup>, Pablo Chacón<sup>2</sup>, Holger Gohlke<sup>1\*</sup>

<sup>1</sup>Institute for Pharmaceutical and Medicinal Chemistry, Heinrich-Heine-University,  
Düsseldorf, Germany

<sup>2</sup>Rocasolano Physical Chemistry Institute, Consejo Superior de Investigaciones  
Científicas, Madrid, Spain

\*Universitätsstr.1, 40225 Düsseldorf (Germany), Fax: (+49) 211-8113847, E-mail:  
[gohlke@uni-duesseldorf.de](mailto:gohlke@uni-duesseldorf.de)

## Supplemental Tables

**Table S1:** 27 targets skipped from the ZDOCK benchmark 3.0 [1].

| <b>PDB ID</b> | <b>Difficulty</b> | <b>Category<sup>[a]</sup></b> |
|---------------|-------------------|-------------------------------|
| 1A2K          | Easy              | O                             |
| 1ACB          | Medium            | E                             |
| 1ATN          | Difficult         | O                             |
| 1AZS          | Easy              | O                             |
| 1E4K          | Difficult         | A                             |
| 1E6E          | Easy              | E                             |
| 1E96          | Easy              | O                             |
| 1EFN          | Easy              | O                             |
| 1F34          | Easy              | E                             |
| 1FAK          | Difficult         | O                             |
| 1FC2          | Easy              | O                             |
| 1FQ1          | Difficult         | E                             |
| 1GHQ          | Easy              | O                             |
| 1GP2          | Medium            | O                             |
| 1GRN          | Medium            | O                             |
| 1H1V          | Difficult         | O                             |
| 1HE8          | Medium            | O                             |
| 1IB1          | Medium            | O                             |
| 1IJK          | Medium            | E                             |
| 1J2J          | Easy              | O                             |
| 1JMO          | Difficult         | O                             |
| 1KLU          | Easy              | O                             |
| 1NW9          | Medium            | E                             |
| 1Z0K          | Easy              | O                             |
| 1Z5Y          | Easy              | O                             |
| 2O8V          | Easy              | E                             |
| 2OOB          | Easy              | O                             |

<sup>[a]</sup> Complex category labels: E = Enzyme/inhibitor or enzyme/substrate, A = Antigen-antibody, AB = Antigen-bound antibody, O = Others.

**Table S2:** Computational efficiency of docking with DrugScore<sup>PPI</sup>/FRODOCK and the original FRODOCK implementation.<sup>[a]</sup>

| Runtime <sup>b</sup>                  |                     | PDB ID | no. of atoms |          |        | max. diameter <sup>c</sup> |
|---------------------------------------|---------------------|--------|--------------|----------|--------|----------------------------|
| DrugScore <sup>PPI</sup> /<br>FRODOCK | Original<br>FRODOCK |        | complex      | receptor | ligand |                            |
| 18                                    | 15                  | 1ACB   | 2291         | 1768     | 522    | 48                         |
| 23                                    | 9                   | 2PCC   | 3218         | 2371     | 847    | 55                         |
| 330                                   | 130                 | 1AHW   | 4916         | 3304     | 1612   | 76                         |

<sup>[a]</sup> Using 16 cores on dual CPU compute servers equipped with 2 GHz Intel Xeon Quadcore CPUs, 24 GB of RAM, and Infiniband interconnect.

<sup>[b]</sup> In min.

<sup>[c]</sup> Maximum diameter of the receptor, which influences the size of the search space. In Å.

**Table S3:** DrugScore<sup>PP1</sup> potential maps and corresponding Sybyl atomtypes.<sup>[a]</sup>

| Potential map | Considered atomtype(s) <sup>[a]</sup> | Definition                                                                      |
|---------------|---------------------------------------|---------------------------------------------------------------------------------|
| C_2           | C.2                                   | sp <sup>2</sup> carbon                                                          |
| C_3           | C.3                                   | sp <sup>3</sup> carbon                                                          |
| C_ar          | C.ar                                  | aromatic carbon                                                                 |
| C_cat         | C.cat                                 | carbocation (C+) in a guanidinium group                                         |
| N_3           | N.2, N.3, N.4                         | nitrogen sp <sup>2</sup> , sp <sup>3</sup> , sp <sup>3</sup> positively charged |
| N_am          | N.am                                  | amide nitrogen                                                                  |
| N_pl3         | N.pl3                                 | trigonal planar nitrogen                                                        |
| O_2           | O.2                                   | sp <sup>2</sup> oxygen                                                          |
| O_3           | O.3                                   | sp <sup>3</sup> oxygen                                                          |
| O_co2         | O.co2                                 | oxygen in a carboxylate group                                                   |
| S_3           | S.3                                   | sp <sup>3</sup> sulfur                                                          |

<sup>[a]</sup> Sybyl atomtype notation from Tripos, available at [http://tripos.com/mol2/atom\\_types.html](http://tripos.com/mol2/atom_types.html).

**Table S4:** Distribution of the decoy quality in the “unbound perturbation” dataset.

| PDB ID <sup>[a]</sup> | < 2 Å <sup>[b]</sup> | < 5 Å <sup>[b]</sup> | < 10 Å <sup>[b]</sup> | ≥ 10 Å <sup>[b]</sup> |
|-----------------------|----------------------|----------------------|-----------------------|-----------------------|
| 1A0O                  | 0.00                 | 0.60                 | 27.76                 | 72.24                 |
| 1ACB                  | 0.10                 | 6.00                 | 25.70                 | 74.30                 |
| 1AHW                  | 0.00                 | 1.23                 | 14.93                 | 85.07                 |
| 1ATN                  | 4.60                 | 9.91                 | 28.60                 | 71.40                 |
| 1AVW                  | 0.00                 | 5.44                 | 29.91                 | 70.09                 |
| 1AVZ                  | 0.00                 | 0.70                 | 15.72                 | 84.28                 |
| 1BQL                  | 0.70                 | 5.73                 | 20.32                 | 79.68                 |
| 1BRC                  | 1.00                 | 5.00                 | 29.60                 | 70.40                 |
| 1CGI                  | 0.40                 | 8.21                 | 27.63                 | 72.37                 |
| 1BRS                  | 0.10                 | 4.30                 | 35.14                 | 64.86                 |
| 1CHO                  | 0.10                 | 6.30                 | 30.50                 | 69.50                 |
| 1BTH                  | 0.00                 | 0.00                 | 17.90                 | 82.10                 |
| 1BVK                  | 0.00                 | 1.31                 | 23.84                 | 76.16                 |
| 1DFJ                  | 0.00                 | 2.42                 | 20.14                 | 79.86                 |
| 1CSE                  | 0.00                 | 8.08                 | 33.23                 | 66.77                 |
| 1DQJ                  | 0.00                 | 0.30                 | 16.28                 | 83.72                 |
| 1EFU                  | 0.00                 | 0.20                 | 6.53                  | 93.47                 |
| 1FBI                  | 0.00                 | 6.23                 | 25.83                 | 74.17                 |
| 1EO8                  | 0.00                 | 0.60                 | 15.88                 | 84.12                 |
| 1FIN                  | 0.00                 | 0.00                 | 5.23                  | 94.77                 |
| 1FQ1                  | 0.00                 | 0.60                 | 22.61                 | 77.39                 |
| 1FSS                  | 0.40                 | 14.70                | 31.50                 | 68.50                 |
| 1GLA                  | 0.10                 | 4.20                 | 32.23                 | 67.77                 |
| 1GOT                  | 0.00                 | 0.20                 | 9.18                  | 90.82                 |
| 1IAI                  | 0.00                 | 4.00                 | 15.40                 | 84.60                 |
| 1IGC                  | 0.70                 | 2.30                 | 31.30                 | 68.70                 |
| 1JHL                  | 0.00                 | 1.70                 | 27.40                 | 72.60                 |
| 1MAH                  | 0.71                 | 21.01                | 37.17                 | 62.83                 |
| 1MDA                  | 0.61                 | 8.99                 | 30.10                 | 69.90                 |
| 1MEL                  | 0.00                 | 5.04                 | 35.75                 | 64.25                 |
| 1MLC                  | 0.40                 | 7.16                 | 28.15                 | 71.85                 |
| 1NCA                  | 1.03                 | 10.70                | 30.66                 | 69.34                 |
| 2BTF                  | 0.61                 | 9.11                 | 29.96                 | 70.04                 |
| 1NMB                  | 6.28                 | 19.13                | 33.20                 | 66.80                 |
| 1PPE                  | 4.92                 | 17.47                | 48.59                 | 51.41                 |
| 1QFU                  | 0.30                 | 9.50                 | 28.01                 | 71.99                 |
| 1TAB                  | 0.10                 | 16.78                | 34.87                 | 65.13                 |
| 1SPB                  | 5.91                 | 13.21                | 32.53                 | 67.47                 |
| 1TGS                  | 2.02                 | 6.98                 | 30.16                 | 69.84                 |
| 1STF                  | 12.63                | 21.44                | 32.57                 | 67.43                 |
| 1UDI                  | 0.80                 | 20.26                | 42.23                 | 57.77                 |
| 2JEL                  | 0.20                 | 6.90                 | 42.50                 | 57.50                 |
| 1UGH                  | 3.61                 | 17.23                | 38.98                 | 61.02                 |
| 2KAI                  | 0.80                 | 19.90                | 41.00                 | 59.00                 |
| 1WEJ                  | 0.00                 | 2.22                 | 24.65                 | 75.35                 |
| 1WQ1                  | 0.00                 | 5.20                 | 34.15                 | 65.85                 |
| 2PCC                  | 0.00                 | 1.91                 | 28.74                 | 71.26                 |
| 2PTC                  | 1.61                 | 5.83                 | 29.05                 | 70.95                 |

---

|                |             |             |              |              |
|----------------|-------------|-------------|--------------|--------------|
| 3HHR           | 0.00        | 0.20        | 10.61        | 89.39        |
| 2SIC           | 0.50        | 17.39       | 33.67        | 66.33        |
| 2SNI           | 0.40        | 9.85        | 29.95        | 70.05        |
| 2TEC           | 4.21        | 13.04       | 31.90        | 68.10        |
| 2VIR           | 0.70        | 6.32        | 37.81        | 62.19        |
| 4HTC           | 0.30        | 10.91       | 28.13        | 71.87        |
| <b>Average</b> | <b>1.05</b> | <b>7.48</b> | <b>27.88</b> | <b>72.12</b> |

---

<sup>[a]</sup> Dataset from Baker and coworkers [2].

<sup>[b]</sup> Percentage of decoys that are within the given all-atom rmsd range.

**Table S5:** Distribution of the decoy quality in the “unbound docking” dataset.<sup>[a]</sup>

| <b>PDB ID</b> <sup>[b]</sup> | <b>&lt; 2 Å</b> <sup>[c]</sup> | <b>&lt; 5 Å</b> <sup>[c]</sup> | <b>&lt; 10 Å</b> <sup>[c]</sup> | <b>≥ 10 Å</b> <sup>[c]</sup> |
|------------------------------|--------------------------------|--------------------------------|---------------------------------|------------------------------|
| 1A0O                         | 0.00                           | 0.50                           | 19.00                           | 81.00                        |
| 1ACB                         | 0.00                           | 0.50                           | 3.00                            | 97.00                        |
| 1AHW                         | 0.00                           | 0.00                           | 5.50                            | 94.50                        |
| 1ATN                         | 2.50                           | 4.50                           | 7.00                            | 93.00                        |
| 1AVW                         | 0.00                           | 0.50                           | 7.50                            | 92.50                        |
| 1AVZ                         | 0.00                           | 0.00                           | 1.00                            | 99.00                        |
| 1BQL                         | 2.50                           | 10.50                          | 17.50                           | 82.50                        |
| 1BRC                         | 0.00                           | 0.00                           | 0.00                            | 100.00                       |
| 1CGI                         | 0.50                           | 10.00                          | 20.50                           | 79.50                        |
| 1BRS                         | 0.00                           | 1.00                           | 15.00                           | 85.00                        |
| 1CHO                         | 0.00                           | 3.00                           | 20.00                           | 80.00                        |
| 1BTH                         | 0.00                           | 0.00                           | 0.00                            | 100.00                       |
| 1BVK                         | 0.00                           | 0.00                           | 75.70                           | 24.30                        |
| 1DFJ                         | 0.00                           | 0.00                           | 0.00                            | 100.00                       |
| 1CSE                         | 0.00                           | 0.00                           | 9.50                            | 90.50                        |
| 1DQJ                         | 0.00                           | 0.00                           | 1.00                            | 99.00                        |
| 1EFU                         | 0.00                           | 0.00                           | 0.50                            | 99.50                        |
| 1FBI                         | 0.00                           | 1.50                           | 1.50                            | 98.50                        |
| 1EO8                         | 0.00                           | 0.00                           | 0.00                            | 100.00                       |
| 1FIN                         | 0.00                           | 0.00                           | 0.00                            | 100.00                       |
| 1FQ1                         | 0.00                           | 0.00                           | 1.00                            | 99.00                        |
| 1FSS                         | 0.00                           | 3.00                           | 3.50                            | 96.50                        |
| 1GLA                         | 0.00                           | 0.00                           | 0.00                            | 100.00                       |
| 1GOT                         | 0.00                           | 0.00                           | 0.00                            | 100.00                       |
| 1IAI                         | 0.00                           | 0.00                           | 0.00                            | 100.00                       |
| 1IGC                         | 0.00                           | 0.00                           | 0.00                            | 100.00                       |
| 1JHL                         | 0.00                           | 0.00                           | 6.12                            | 93.88                        |
| 1MAH                         | 0.50                           | 7.00                           | 7.50                            | 92.50                        |
| 1MDA                         | 0.00                           | 0.00                           | 0.00                            | 100.00                       |
| 1MEL                         | 0.00                           | 5.00                           | 20.00                           | 80.00                        |
| 1MLC                         | 0.50                           | 3.50                           | 4.50                            | 95.50                        |
| 1NCA                         | 0.00                           | 0.00                           | 0.00                            | 100.00                       |
| 2BTF                         | 0.00                           | 0.00                           | 0.00                            | 100.00                       |
| 1NMB                         | 0.00                           | 0.00                           | 0.00                            | 100.00                       |
| 1PPE                         | 7.50                           | 24.50                          | 83.00                           | 17.00                        |
| 1QFU                         | 0.00                           | 1.00                           | 1.50                            | 98.50                        |
| 1TAB                         | 0.00                           | 12.50                          | 22.50                           | 77.50                        |
| 1SPB                         | 3.00                           | 4.50                           | 7.50                            | 92.50                        |
| 1TGS                         | 0.50                           | 6.50                           | 25.50                           | 74.50                        |
| 1STF                         | 4.50                           | 8.00                           | 9.00                            | 91.00                        |
| 1UDI                         | 0.00                           | 5.35                           | 10.16                           | 89.84                        |
| 2JEL                         | 2.50                           | 16.50                          | 41.50                           | 58.50                        |
| 1UGH                         | 3.00                           | 18.00                          | 35.50                           | 64.50                        |
| 2KAI                         | 1.50                           | 30.50                          | 41.50                           | 58.50                        |
| 1WEJ                         | 0.00                           | 0.00                           | 0.00                            | 100.00                       |
| 1WQ1                         | 0.00                           | 0.00                           | 4.00                            | 96.00                        |
| 2PCC                         | 0.00                           | 0.00                           | 0.00                            | 100.00                       |
| 2PTC                         | 0.50                           | 2.00                           | 3.50                            | 96.50                        |

---

|                              |                    |                    |                     |                      |
|------------------------------|--------------------|--------------------|---------------------|----------------------|
| <i>3HHR</i>                  | <i>0.00</i>        | <i>0.00</i>        | <i>0.00</i>         | <i>100.00</i>        |
| 2SIC                         | 0.00               | 7.50               | 9.00                | 91.00                |
| 2SNI                         | 1.00               | 3.00               | 10.00               | 90.00                |
| 2TEC                         | 2.50               | 8.00               | 11.50               | 88.50                |
| <i>2VIR</i>                  | <i>0.00</i>        | <i>0.00</i>        | <i>0.00</i>         | <i>100.00</i>        |
| 4HTC                         | 0.00               | 5.00               | 20.00               | 80.00                |
| <b>Average<sup>[d]</sup></b> | <b>1.10 (0.00)</b> | <b>6.68 (0.13)</b> | <b>19.10 (0.40)</b> | <b>80.90 (99.60)</b> |

---

<sup>[a]</sup> 24 targets where 97% or more of the decoys have an all-atom rmsd > 10Å are marked in grey. For 17 out of these 24 decoys no solution with an all-atom rmsd < 10Å was generated. For 7 decoys only one solution with an all-atom rmsd < 10Å was found in the whole decoy set.

<sup>[b]</sup> Dataset from Baker and coworkers [2].

<sup>[c]</sup> Percentage of decoys that are within the given all-atom rmsd range.

<sup>[d]</sup> Numbers not in brackets refer to decoy sets where at least two decoys with an all-atom rmsd < 10Å are available; numbers in brackets consider decoy sets where less than two decoys with rmsd < 10Å are available.



**Table S6:** Results from rescoring “unbound perturbation” decoys with DrugScore<sup>PP1</sup>.

| PDB ID <sup>[a]</sup> | N10Å <sup>[b]</sup> |                     | Best rmsd <sup>[c]</sup> |                     |
|-----------------------|---------------------|---------------------|--------------------------|---------------------|
|                       | This work           | Baker and coworkers | This work                | Baker and coworkers |
| 1A0O                  | 1                   | 1                   | 8.35                     | 8.22                |
| 1ACB                  | 0                   | 2                   | 11.14                    | 9.08                |
| 1AHW                  | 3                   | 5                   | 7.40                     | 6.17                |
| 1ATN                  | 5                   | 5                   | 2.37                     | 0.96                |
| 1AVW                  | 5                   | 5                   | 5.14                     | 6.11                |
| 1AVZ                  | 0                   | 0                   | 10.12                    | 10.14               |
| 1BQL                  | 1                   | 5                   | 1.57                     | 1.40                |
| 1BRC                  | 4                   | 1                   | 3.60                     | 3.76                |
| 1BRS                  | 6                   | 4                   | 8.42                     | 3.89                |
| 1BTH                  | 6                   | 0                   | 5.15                     | 18.23               |
| 1BVK                  | 3                   | 5                   | 6.70                     | 6.25                |
| 1CGI                  | 6                   | 4                   | 3.24                     | 3.15                |
| 1CHO                  | 1                   | 3                   | 5.25                     | 5.61                |
| 1CSE                  | 4                   | 2                   | 6.11                     | 8.65                |
| 1DFJ                  | 6                   | 4                   | 4.30                     | 3.92                |
| 1DQJ                  | 3                   | 2                   | 6.65                     | 5.86                |
| 1EFU                  | 0                   | 0                   | 19.31                    | 10.64               |
| 1EO8                  | 0                   | 1                   | 12.35                    | 7.38                |
| 1FBI                  | 2                   | 3                   | 3.58                     | 2.71                |
| 1FIN                  | 0                   | 0                   | 14.82                    | 16.56               |
| 1FQ1                  | 4                   | 2                   | 7.34                     | 9.61                |
| 1FSS                  | 6                   | 5                   | 4.48                     | 2.98                |
| 1GLA                  | 0                   | 1                   | 15.17                    | 5.95                |
| 1GOT                  | 0                   | 0                   | 16.60                    | 19.27               |
| 1IAI                  | 4                   | 0                   | 3.96                     | 14.11               |
| 1IGC                  | 4                   | 2                   | 1.92                     | 1.92                |
| 1JHL                  | 3                   | 1                   | 6.11                     | 8.56                |
| 1MAH                  | 6                   | 5                   | 4.60                     | 2.36                |
| 1MDA                  | 2                   | 3                   | 3.00                     | 7.86                |
| 1MEL                  | 4                   | 5                   | 4.43                     | 5.38                |
| 1MLC                  | 0                   | 0                   | 11.16                    | 18.89               |
| 1NCA                  | 6                   | 5                   | 1.24                     | 1.24                |
| 1NMB                  | 1                   | 5                   | 2.66                     | 0.65                |
| 1PPE                  | 6                   | 5                   | 1.38                     | 0.61                |
| 1QFU                  | 0                   | 5                   | 14.28                    | 2.00                |
| 1SPB                  | 6                   | 5                   | 0.88                     | 0.91                |
| 1STF                  | 5                   | 5                   | 1.57                     | 1.31                |
| 1TAB                  | 4                   | 5                   | 3.37                     | 3.67                |
| 1TGS                  | 5                   | 5                   | 0.62                     | 1.39                |
| 1UDI                  | 5                   | 5                   | 2.08                     | 1.16                |
| 1UGH                  | 6                   | 5                   | 1.68                     | 1.69                |
| 1WEJ                  | 4                   | 0                   | 6.83                     | 10.65               |
| 1WQ1                  | 2                   | 3                   | 5.81                     | 3.99                |
| 2BTF                  | 2                   | 4                   | 2.40                     | 1.90                |
| 2JEL                  | 6                   | 5                   | 4.71                     | 4.71                |
| 2KAI                  | 6                   | 4                   | 1.21                     | 2.04                |
| 2PCC                  | 4                   | 3                   | 8.76                     | 7.28                |

---

|               |                          |                          |                          |                          |
|---------------|--------------------------|--------------------------|--------------------------|--------------------------|
| 2PTC          | 4                        | 2                        | 5.20                     | 0.98                     |
| 2SIC          | 6                        | 5                        | 2.64                     | 2.41                     |
| 2SNI          | 6                        | 4                        | 1.61                     | 1.61                     |
| 2TEC          | 5                        | 5                        | 1.97                     | 2.25                     |
| 2VIR          | 3                        | 4                        | 4.99                     | 6.12                     |
| 3HHR          | 0                        | 0                        | 12.53                    | 10.75                    |
| 4HTC          | 6                        | 5                        | 3.64                     | 3.81                     |
| <b>Totals</b> | <b>31</b> <sup>[d]</sup> | <b>34</b> <sup>[d]</sup> | <b>44</b> <sup>[e]</sup> | <b>45</b> <sup>[e]</sup> |

---

<sup>[a]</sup> Dataset from Baker and coworkers [2].

<sup>[b]</sup> No of decoys that have all-atom rmsd < 10Å in the top 5.

<sup>[c]</sup> Best all-atom rmsd in the top 5. In Å.

<sup>[d]</sup> Totals count the number of targets that have at least three solutions with an all-atom rmsd < 10Å in the top 5.

<sup>[e]</sup> Totals count the number of targets that have an all-atom rmsd < 10Å in the top 5.

**Table S7:** Results from rescoring “unbound docking” decoys with DrugScore<sup>PP1</sup>.

| PDB ID <sup>[a]</sup> | Best rmsd <sup>[b]</sup> |                     |
|-----------------------|--------------------------|---------------------|
|                       | This work                | Baker and coworkers |
| 1A00                  | 5.08                     | 5.08                |
| 1ACB                  | 12.29                    | 11.84               |
| 1AHW                  | 7.57                     | 7.24                |
| 1ATN                  | 2.3                      | 2.30                |
| 1AVW                  | 6.47                     | 5.76                |
| 1AVZ                  | 19.84                    | 20.03               |
| 1BQL                  | 1.24                     | 2.09                |
| 1BRC                  | 15.96                    | 15.96               |
| 1BRS                  | 6.59                     | 8.67                |
| 1BTH                  | 17.37                    | 16.96               |
| 1BVK                  | 6.32                     | 6.15                |
| 1CGI                  | 3.88                     | 3.27                |
| 1CHO                  | 4.82                     | 6.88                |
| 1CSE                  | 8.59                     | 8.87                |
| 1DFJ                  | 20.59                    | 22.09               |
| 1DQJ                  | 17.75                    | 17.75               |
| 1EFU                  | 29.51                    | 29.51               |
| 1EO8                  | 29.43                    | 56.51               |
| 1FBI                  | 20.99                    | 22.25               |
| 1FIN                  | 27.15                    | 26.84               |
| 1FQ1                  | 25.59                    | 24.64               |
| 1FSS                  | 2.34                     | 3.19                |
| 1GLA                  | 53.04                    | 25.66               |
| 1GOT                  | 55.46                    | 55.84               |
| 1IAI                  | 34.04                    | 33.96               |
| 1IGC                  | 28.09                    | 24.19               |
| 1JHL                  | 9.4                      | 14.91               |
| 1MAH                  | 2.4                      | 2.40                |
| 1MDA                  | 54.18                    | 53.71               |
| 1MEL                  | 3.56                     | 5.80                |
| 1MLC                  | 6.52                     | 2.52                |
| 1NCA                  | 31.28                    | 31.47               |
| 1NMB                  | 72.82                    | 72.48               |
| 1PPE                  | 3.66                     | 0.59                |
| 1QFU                  | 28.55                    | 3.20                |
| 1SPB                  | 0.9                      | 1.32                |
| 1STF                  | 2.32                     | 0.56                |
| 1TAB                  | 3.78                     | 3.35                |
| 1TGS                  | 4.48                     | 3.31                |
| 1UDI                  | 3.75                     | 3.75                |
| 1UGH                  | 1.28                     | 2.15                |
| 1WEJ                  | 17.9                     | 17.90               |
| 1WQ1                  | 5.08                     | 44.03               |
| 2BTF                  | 11.97                    | 27.52               |
| 2JEL                  | 3.42                     | 1.45                |
| 2KAI                  | 3.09                     | 2.40                |
| 2PCC                  | 18.75                    | 19.07               |

---

|                           |               |               |
|---------------------------|---------------|---------------|
| 2PTC                      | 9.69          | 10.35         |
| 2SIC                      | 4.93          | 2.98          |
| 2SNI                      | 1.36          | 1.36          |
| 2TEC                      | 0.87          | 2.09          |
| 2VIR                      | 56.65         | 41.47         |
| 3HHR                      | 33.95         | 33.90         |
| 4HTC                      | 4.8           | 3.84          |
| <b>R10Å<sup>[c]</sup></b> | <b>24 (6)</b> | <b>22 (6)</b> |
| <b>R5Å<sup>[d]</sup></b>  | <b>17 (5)</b> | <b>15 (5)</b> |

---

<sup>[a]</sup> Dataset from Baker and coworkers [2].

<sup>[b]</sup> Best all-atom rmsd in the top 10. In Å. Decoys were clustered according to Baker and coworkers [2].

<sup>[c]</sup> Number of targets that have at least one solution with all-atom rmsd < 10Å in the first solutions of the top 10 clusters. Numbers not in brackets refer to decoy sets where at least two decoys with rmsd < 10Å are available; numbers in brackets refer to decoy sets where less than two decoys with rmsd < 10Å are available.

<sup>[d]</sup> Number of targets that have at least one solution with all-atom rmsd < 5Å in the first solutions of the top 10 clusters. Numbers not in brackets refer to decoy sets where at least two decoys with rmsd < 10Å are available; numbers in brackets refer to decoy sets where less than two decoys with rmsd < 10Å are available.

**Table S8:** Protein-protein complexes where multiple ligand binding modes have to be considered for rmsd calculations.

| <b>Difficulty</b> | <b>Category<sup>[a]</sup></b> | <b>PDB ID</b> |
|-------------------|-------------------------------|---------------|
| Easy              | E                             | 1EZU          |
| Easy              | O                             | 1F51          |
| Easy              | AB                            | 1I9R          |
| Easy              | AB                            | 1QFW          |
| Easy              | O                             | 1RLB          |
| Easy              | E                             | 2PCC          |
| Easy              | O                             | 1SBB          |
| Medium            | E                             | 1KKL          |
| Medium            | O                             | 1N2C          |
| Medium            | O                             | 2H7V          |
| Difficult         | O                             | 1DE4          |

<sup>[a]</sup> Complex category labels: E = Enzyme/inhibitor or enzyme/substrate, A = Antigen-antibody, AB = Antigen-bound antibody, O = Others.

**Table S9:** Results for bound docking with the DrugScore<sup>PP1</sup>/FRODOCK approach.<sup>[a]</sup>

| Difficulty | Category <sup>[b]</sup> | PDB ID <sup>[c]</sup> | Quality_1 <sup>[d]</sup> | Quality_2 <sup>[e]</sup> | Quality_3 <sup>[f]</sup> | i_rmsd <sup>[g]</sup> | l_rmsd <sup>[h]</sup> | f <sub>nat</sub> <sup>[i]</sup> | f <sub>not</sub> <sup>[j]</sup> |
|------------|-------------------------|-----------------------|--------------------------|--------------------------|--------------------------|-----------------------|-----------------------|---------------------------------|---------------------------------|
| Easy       | A                       | 1AHW                  | -                        | 260                      | 260                      | 1.58                  | 2.19                  | 0.92                            | 0.25                            |
| Easy       | O                       | 1AK4                  | -                        | 91                       | 91                       | 1.43                  | 3.73                  | 0.83                            | 0.18                            |
| Easy       | O                       | 1AKJ                  | -                        | 21                       | 21                       | 2.11                  | 4.34                  | 0.85                            | 0.32                            |
| Easy       | E                       | 1AVX                  | -                        | 1                        | 1                        | 1.27                  | 2.96                  | 0.94                            | 0.26                            |
| Easy       | E                       | 1AY7                  | -                        | 1                        | 1                        | 1.09                  | 1.31                  | 0.96                            | 0.16                            |
| Easy       | O                       | 1B6C                  | -                        | 1                        | 1                        | 1.53                  | 1.63                  | 0.97                            | 0.25                            |
| Medium     | A                       | 1BGX                  | -                        | 1                        | 1                        | 2.45                  | 4.72                  | 0.82                            | 0.26                            |
| Easy       | AB                      | 1BJ1                  | 4                        | 4                        | 4                        | 0.84                  | 2.02                  | 0.93                            | 0.05                            |
| Difficult  | O                       | 1BKD                  | 1                        | 1                        | 1                        | 0.48                  | 0.57                  | 0.92                            | 0.03                            |
| Easy       | O                       | 1BUH                  | -                        | 7                        | 7                        | 1.12                  | 1.06                  | 0.83                            | 0.04                            |
| Easy       | A                       | 1BVK                  | 10                       | 10                       | 10                       | 0.97                  | 1.19                  | 0.92                            | 0.18                            |
| Easy       | E                       | 1BVN                  | 1                        | 1                        | 1                        | 0.39                  | 0.41                  | 0.96                            | 0.12                            |
| Easy       | E                       | 1CGI                  | 1                        | 1                        | 1                        | 0.92                  | 0.94                  | 0.82                            | 0.03                            |
| Easy       | E                       | 1D6R                  | 1                        | 1                        | 1                        | 0.62                  | 0.56                  | 0.94                            | 0.03                            |
| Difficult  | O                       | 1DE4                  | -                        | 803                      | 803                      | 1.55                  | 2.50                  | 0.97                            | 0.27                            |
| Easy       | E                       | 1DFJ                  | -                        | 1                        | 1                        | 1.44                  | 1.70                  | 0.86                            | 0.24                            |
| Easy       | A                       | 1DQJ                  | 1                        | 1                        | 1                        | 1.03                  | 1.06                  | 0.97                            | 0.27                            |
| Easy       | A                       | 1E6J                  | -                        | -                        | -                        | -                     | -                     | -                               | -                               |
| Easy       | E                       | 1EAW                  | -                        | 1                        | 1                        | 1.18                  | 1.39                  | 0.95                            | 0.14                            |
| Difficult  | O                       | 1EER                  | 1                        | 1                        | 1                        | 0.72                  | 0.66                  | 0.90                            | 0.03                            |
| Easy       | E                       | 1EWY                  | -                        | 943                      | 2                        | 9.60                  | 9.68                  | 0.18                            | 0.89                            |
| Easy       | E                       | 1EZU                  | 1                        | 1                        | 1                        | 0.72                  | 0.59                  | 0.93                            | 0.08                            |
| Easy       | O                       | 1F51                  | -                        | 1                        | 1                        | 1.31                  | 1.08                  | 0.85                            | 0.15                            |
| Easy       | O                       | 1FQJ                  | -                        | 3                        | 3                        | 1.20                  | 1.50                  | 0.88                            | 0.11                            |
| Easy       | AB                      | 1FSK                  | -                        | 1                        | 1                        | 1.09                  | 1.15                  | 0.93                            | 0.18                            |
| Easy       | O                       | 1GCQ                  | -                        | 1                        | 1                        | 1.59                  | 1.52                  | 0.93                            | 0.23                            |
| Easy       | O                       | 1GLA                  | -                        | -                        | -                        | -                     | -                     | -                               | -                               |
| Easy       | O                       | 1GPW                  | -                        | 1                        | 1                        | 1.56                  | 2.12                  | 0.85                            | 0.23                            |
| Easy       | O                       | 1HE1                  | 1                        | 1                        | 1                        | 0.59                  | 0.69                  | 0.89                            | 0.02                            |
| Easy       | E                       | 1HIA                  | 1                        | 1                        | 1                        | 0.74                  | 1.07                  | 0.91                            | 0.14                            |
| Medium     | O                       | 1I2M                  | -                        | 1                        | 1                        | 1.16                  | 1.16                  | 0.91                            | 0.18                            |
| Easy       | O                       | 1I4D                  | -                        | -                        | -                        | -                     | -                     | -                               | -                               |
| Easy       | AB                      | 1I9R                  | -                        | -                        | -                        | -                     | -                     | -                               | -                               |
| Difficult  | O                       | 1IBR                  | -                        | 1                        | 1                        | 1.08                  | 1.08                  | 0.91                            | 0.10                            |
| Easy       | AB                      | 1IQD                  | -                        | 1                        | 1                        | 1.15                  | 1.16                  | 0.85                            | 0.15                            |
| Difficult  | O                       | 1IRA                  | -                        | 1                        | 1                        | 1.41                  | 1.44                  | 0.87                            | 0.27                            |
| Easy       | A                       | 1JPS                  | -                        | 8                        | 8                        | 1.57                  | 1.55                  | 0.95                            | 0.34                            |
| Easy       | AB                      | 1K4C                  | -                        | 2                        | 2                        | 1.09                  | 1.06                  | 0.90                            | 0.15                            |
| Medium     | O                       | 1K5D                  | -                        | 9                        | 9                        | 1.61                  | 2.14                  | 0.83                            | 0.16                            |
| Easy       | O                       | 1K74                  | -                        | 2                        | 2                        | 1.51                  | 2.78                  | 0.82                            | 0.19                            |
| Easy       | O                       | 1KAC                  | -                        | 184                      | 81                       | 7.17                  | 9.56                  | 0.31                            | 0.78                            |
| Medium     | E                       | 1KKL                  | -                        | 12                       | 12                       | 1.21                  | 2.04                  | 0.89                            | 0.19                            |
| Easy       | O                       | 1KTZ                  | -                        | 491                      | 491                      | 3.78                  | 6.81                  | 0.69                            | 0.62                            |
| Easy       | O                       | 1KXP                  | -                        | 3                        | 3                        | 1.81                  | 3.21                  | 0.80                            | 0.13                            |
| Easy       | AB                      | 1KXQ                  | -                        | 1                        | 1                        | 1.13                  | 1.13                  | 0.95                            | 0.25                            |
| Medium     | E                       | 1M10                  | -                        | 2                        | 2                        | 2.12                  | 3.24                  | 0.80                            | 0.12                            |
| Easy       | E                       | 1MAH                  | -                        | 1                        | 1                        | 1.72                  | 2.20                  | 0.86                            | 0.24                            |

|           |    |      |     |      |      |      |      |      |      |
|-----------|----|------|-----|------|------|------|------|------|------|
| Easy      | O  | 1ML0 | -   | 2    | 2    | 1.39 | 1.34 | 0.96 | 0.23 |
| Easy      | A  | 1MLC | 18  | 18   | 18   | 1.00 | 1.09 | 0.93 | 0.16 |
| Medium    | O  | 1N2C | 1   | 1    | 1    | 0.95 | 0.95 | 0.88 | 0.23 |
| Easy      | E  | 1N8O | -   | 1    | 1    | 1.50 | 3.10 | 0.92 | 0.15 |
| Easy      | AB | 1NCA | -   | 3    | 3    | 2.43 | 4.25 | 0.75 | 0.19 |
| Easy      | AB | 1NSN | -   | 250  | 246  | 8.07 | 9.97 | 0.31 | 0.80 |
| Easy      | E  | 1OPH | -   | 4    | 4    | 1.95 | 3.45 | 0.91 | 0.18 |
| Easy      | E  | 1PPE | -   | 1    | 1    | 1.99 | 1.95 | 0.89 | 0.31 |
| Difficult | E  | 1PXV | -   | 1    | 1    | 1.61 | 2.79 | 0.88 | 0.19 |
| Easy      | O  | 1QA9 | -   | 988  | 469  | 9.24 | 9.85 | 0.21 | 0.83 |
| Easy      | AB | 1QFW | -   | 18   | 18   | 1.45 | 1.29 | 0.93 | 0.21 |
| Easy      | E  | 1R0R | -   | 1    | 1    | 1.57 | 4.96 | 0.92 | 0.24 |
| Difficult | O  | 1R8S | -   | 1    | 1    | 3.75 | 5.60 | 0.78 | 0.27 |
| Easy      | O  | 1RLB | -   | -    | 609  | 7.71 | 9.83 | 0.30 | 0.76 |
| Easy      | O  | 1S1Q | 28  | 28   | 28   | 0.96 | 0.94 | 0.94 | 0.19 |
| Easy      | O  | 1SBB | -   | -    | -    | -    | -    | -    | -    |
| Easy      | O  | 1T6B | -   | 3    | 3    | 1.77 | 2.76 | 0.85 | 0.24 |
| Easy      | E  | 1TMQ | -   | 1    | 1    | 1.75 | 1.73 | 0.97 | 0.38 |
| Easy      | E  | 1UDI | -   | 1    | 1    | 1.43 | 1.74 | 0.95 | 0.22 |
| Easy      | A  | 1VFB | 9   | 9    | 9    | 0.72 | 0.88 | 0.88 | 0.06 |
| Easy      | A  | 1WEJ | 312 | 15   | 15   | 1.80 | 3.72 | 0.79 | 0.22 |
| Medium    | O  | 1WQ1 | 1   | 1    | 1    | 0.92 | 1.44 | 0.91 | 0.08 |
| Easy      | O  | 1XD3 | -   | 1    | 1    | 5.71 | 5.47 | 0.91 | 0.16 |
| Medium    | O  | 1XQS | -   | 1    | 1    | 1.84 | 4.35 | 0.79 | 0.17 |
| Difficult | O  | 1Y64 | -   | 40   | 40   | 1.50 | 2.68 | 0.88 | 0.32 |
| Easy      | E  | 1YVB | 2   | 1    | 1    | 2.25 | 5.96 | 0.75 | 0.35 |
| Easy      | O  | 1ZHI | -   | 65   | 65   | 1.15 | 1.18 | 0.96 | 0.29 |
| Easy      | O  | 2AJF | -   | 644  | 155  | 6.81 | 8.03 | 0.47 | 0.71 |
| Easy      | E  | 2B42 | -   | 1    | 1    | 1.11 | 1.48 | 0.96 | 0.24 |
| Easy      | O  | 2BTF | -   | 1    | 1    | 1.30 | 1.45 | 0.71 | 0.06 |
| Difficult | O  | 2C0L | -   | 1    | 1    | 2.43 | 4.14 | 0.95 | 0.27 |
| Medium    | O  | 2CFH | -   | 1    | 1    | 1.67 | 1.91 | 0.93 | 0.31 |
| Easy      | A  | 2FD6 | -   | 666  | 55   | 8.93 | 9.54 | 0.25 | 0.82 |
| Medium    | O  | 2H7V | -   | 79   | 79   | 1.08 | 1.37 | 0.86 | 0.06 |
| Easy      | O  | 2HLE | 1   | 1    | 1    | 0.85 | 5.50 | 0.94 | 0.12 |
| Difficult | AB | 2HMI | -   | -    | -    | -    | -    | -    | -    |
| Easy      | O  | 2HQS | -   | 1    | 1    | 1.51 | 3.41 | 0.97 | 0.20 |
| Medium    | O  | 2HRK | 6   | 6    | 6    | 0.89 | 1.00 | 0.92 | 0.02 |
| Easy      | A  | 2I25 | 1   | 1    | 1    | 0.67 | 0.94 | 0.95 | 0.03 |
| Easy      | AB | 2JEL | -   | 1    | 1    | 1.30 | 1.80 | 0.85 | 0.10 |
| Easy      | E  | 2MTA | -   | 105  | 105  | 1.66 | 2.55 | 0.88 | 0.38 |
| Medium    | O  | 2NZ8 | -   | 1    | 1    | 1.23 | 1.18 | 0.93 | 0.22 |
| Difficult | O  | 2OT3 | -   | 1    | 1    | 1.12 | 1.12 | 0.94 | 0.09 |
| Easy      | E  | 2PCC | -   | -    | 226  | 6.93 | 9.83 | 0.44 | 0.73 |
| Easy      | AB | 2QFW | 1   | 1    | 1    | 0.98 | 1.13 | 0.96 | 0.15 |
| Easy      | E  | 2SIC | -   | 1    | 1    | 1.96 | 2.48 | 0.83 | 0.24 |
| Easy      | E  | 2SNI | -   | 1    | 1    | 1.09 | 6.01 | 0.92 | 0.28 |
| Easy      | E  | 2UUY | -   | 1944 | 1944 | 3.00 | 9.00 | 0.77 | 0.35 |
| Easy      | A  | 2VIS | 1   | 1    | 1    | 1.05 | 1.58 | 0.91 | 0.10 |
| Easy      | E  | 7CEI | -   | 260  | 260  | 1.58 | 2.19 | 0.92 | 0.25 |

<sup>[a]</sup> Subset of 97 structures from the ZDOCK benchmark 3.0.

<sup>[b]</sup> Complex category labels: E = Enzyme/inhibitor or enzyme/substrate, A = Antigen-antibody, AB = Antigen-bound antibody, O = Others.

<sup>[c]</sup> Subset of 27 structures skipped from the ZDOCK benchmark 3.0. For details see Materials and Methods section.

<sup>[d]</sup> Rank of the first solution that has a high accuracy. The lower the rank, the better is the prediction. “-“ denotes that no solution was found.

<sup>[e]</sup> Rank of the first solution that has at least medium accuracy. The lower the rank, the better is the prediction. “-“ denotes that no solution was found.

<sup>[f]</sup> Rank of the first solution that has at least acceptable accuracy. The lower the rank, the better is the prediction. “-“ denotes that no solution was found. Additional details for this case are given in the subsequent columns.

<sup>[g]</sup>: All-atom interface RMSD of the docked ligand and its bound crystal structure conformation.

<sup>[h]</sup>: All-atom RMSD of the docked ligand and its bound crystal structure conformation.

<sup>[i]</sup>: Fraction of native residue-residue contacts of the docked ligand conformation compared to its bound crystal structure conformation.

<sup>[j]</sup>: Fraction of non-native residue-residue contacts of the docked ligand conformation compared to its bound crystal structure conformation.



**Table S10:** Results for bound docking with the original FRODOCK implementation.<sup>[a]</sup>

| Difficulty | Category | PDB ID | Quality_1 | Quality_2 | Quality_3 | i_rmsd | l_rmsd | f <sub>nat</sub> | f <sub>not</sub> |
|------------|----------|--------|-----------|-----------|-----------|--------|--------|------------------|------------------|
| Easy       | A        | 1AHW   | -         | 10        | 10        | 1.71   | 1.89   | 0.82             | 0.19             |
| Easy       | O        | 1AK4   | -         | 546       | 546       | 7.47   | 9.54   | 0.73             | 0.45             |
| Easy       | O        | 1AKJ   | -         | 665       | 665       | 3.48   | 5.61   | 0.68             | 0.37             |
| Easy       | E        | 1AVX   | -         | 1         | 1         | 2.12   | 3.56   | 0.97             | 0.26             |
| Easy       | E        | 1AY7   | -         | 1         | 1         | 1.63   | 2.19   | 0.88             | 0.18             |
| Easy       | O        | 1B6C   | -         | 1         | 1         | 3.16   | 3.73   | 0.89             | 0.25             |
| Medium     | A        | 1BGX   | -         | 1         | 1         | 2.02   | 2.16   | 0.82             | 0.25             |
| Easy       | AB       | 1BJ1   | -         | 6         | 6         | 1.29   | 2.95   | 0.83             | 0.13             |
| Difficult  | O        | 1BKD   | 1         | 1         | 1         | 0.88   | 0.97   | 0.85             | 0.08             |
| Easy       | O        | 1BUH   | 27        | 27        | 27        | 0.81   | 0.87   | 0.94             | 0                |
| Easy       | A        | 1BVK   | -         | 24        | 24        | 2.11   | 2.46   | 0.69             | 0.08             |
| Easy       | E        | 1BVN   | -         | 1         | 1         | 2.99   | 3.36   | 0.78             | 0.23             |
| Easy       | E        | 1CGI   | 1         | 1         | 1         | 0.91   | 0.94   | 0.87             | 0.03             |
| Easy       | E        | 1D6R   | -         | 27        | 27        | 1.91   | 2.95   | 0.88             | 0.1              |
| Difficult  | O        | 1DE4   | 23        | 23        | 23        | 0.89   | 1.14   | 0.91             | 0.04             |
| Easy       | E        | 1DFJ   | -         | 329       | 52        | 6.32   | 6.41   | 0.45             | 0.77             |
| Easy       | A        | 1DQJ   | -         | 12        | 12        | 1.24   | 1.54   | 0.85             | 0.15             |
| Easy       | A        | 1E6J   | -         | -         | -         | -      | -      | -                | -                |
| Easy       | E        | 1EAW   | -         | 1         | 1         | 2.09   | 2.15   | 0.91             | 0.35             |
| Difficult  | O        | 1EER   | -         | 1         | 1         | 2.01   | 2.52   | 0.82             | 0.22             |
| Easy       | E        | 1EWY   | -         | 3         | 3         | 2.96   | 2.91   | 0.83             | 0.5              |
| Easy       | E        | 1EZU   | -         | 2         | 2         | 2.02   | 2.55   | 0.8              | 0.17             |
| Easy       | O        | 1F51   | -         | 4         | 4         | 1.59   | 1.87   | 0.89             | 0.11             |
| Easy       | O        | 1FQJ   | -         | 119       | 74        | 5.21   | 6.64   | 0.44             | 0.55             |
| Easy       | AB       | 1FSK   | -         | 1         | 1         | 1.95   | 2.88   | 0.72             | 0.23             |
| Easy       | O        | 1GCQ   | -         | 20        | 20        | 1.67   | 2.03   | 0.9              | 0.21             |
| Easy       | O        | 1GLA   | -         | 89        | 89        | 5.1    | 6      | 0.6              | 0.38             |
| Easy       | O        | 1GPW   | -         | 1         | 1         | 3.59   | 5.9    | 0.71             | 0.55             |
| Easy       | O        | 1HE1   | -         | 1         | 1         | 1.75   | 1.63   | 0.65             | 0.08             |
| Easy       | E        | 1HIA   | -         | 1         | 1         | 1.35   | 1.42   | 0.94             | 0.21             |
| Medium     | O        | 1I2M   | -         | 1         | 1         | 1.72   | 1.89   | 0.77             | 0.09             |
| Easy       | O        | 1I4D   | -         | -         | -         | -      | -      | -                | -                |
| Easy       | AB       | 1I9R   | -         | -         | -         | -      | -      | -                | -                |
| Difficult  | O        | 1IBR   | -         | 1         | 1         | 1.56   | 1.82   | 0.91             | 0.15             |
| Easy       | AB       | 1IQD   | -         | 6         | 6         | 1.56   | 2.34   | 0.89             | 0.11             |
| Difficult  | O        | 1IRA   | -         | 1         | 1         | 2.17   | 2.38   | 0.78             | 0.31             |
| Easy       | A        | 1JPS   | -         | 11        | 11        | 2.41   | 3      | 0.9              | 0.27             |
| Easy       | AB       | 1K4C   | -         | 499       | 499       | 1.35   | 2.31   | 0.81             | 0.09             |
| Medium     | O        | 1K5D   | 1         | 1         | 1         | 1.05   | 1.09   | 0.91             | 0.09             |
| Easy       | O        | 1K74   | -         | 3         | 3         | 5.27   | 9.31   | 0.71             | 0.55             |
| Easy       | O        | 1KAC   | 51        | 20        | 20        | 2.68   | 4.6    | 0.8              | 0.18             |
| Medium     | E        | 1KKL   | 16        | 16        | 16        | 0.98   | 1.08   | 0.95             | 0.08             |
| Easy       | O        | 1KTZ   | -         | 158       | 158       | 2.32   | 3.19   | 0.9              | 0.38             |
| Easy       | O        | 1KXP   | -         | 1         | 1         | 1.59   | 2.65   | 0.86             | 0.12             |
| Easy       | AB       | 1KXQ   | -         | 1         | 1         | 2.01   | 2.7    | 0.89             | 0.25             |
| Medium     | E        | 1M10   | -         | 1         | 1         | 2.01   | 2.55   | 0.93             | 0.19             |
| Easy       | E        | 1MAH   | -         | 1         | 1         | 1.89   | 1.93   | 0.92             | 0.26             |
| Easy       | O        | 1ML0   | -         | 2         | 2         | 2.31   | 2.54   | 0.85             | 0.2              |

|           |    |      |     |      |      |      |      |      |      |
|-----------|----|------|-----|------|------|------|------|------|------|
| Easy      | A  | 1MLC | -   | 4    | 4    | 1.99 | 3.32 | 0.82 | 0.25 |
| Medium    | O  | 1N2C | -   | 3    | 3    | 2.26 | 3.14 | 0.71 | 0.08 |
| Easy      | E  | 1N8O | -   | 1    | 1    | 2.14 | 3.14 | 0.91 | 0.16 |
| Easy      | AB | 1NCA | -   | 28   | 28   | 1.32 | 2.45 | 0.82 | 0.11 |
| Easy      | AB | 1NSN | -   | 160  | 160  | 1.87 | 1.95 | 0.78 | 0.28 |
| Easy      | E  | 1OPH | -   | 51   | 51   | 2.56 | 3.48 | 0.87 | 0.11 |
| Easy      | E  | 1PPE | 1   | 1    | 1    | 0.82 | 0.83 | 0.96 | 0.15 |
| Difficult | E  | 1PXV | -   | 1    | 1    | 1.37 | 1.76 | 0.9  | 0.11 |
| Easy      | O  | 1QA9 | -   | -    | -    | -    | -    | -    | -    |
| Easy      | AB | 1QFW | -   | 186  | 186  | 1.68 | 2.77 | 0.92 | 0.24 |
| Easy      | E  | 1R0R | -   | 2    | 2    | 4.49 | 4.88 | 0.93 | 0.14 |
| Difficult | O  | 1R8S | -   | 6    | 4    | 7.43 | 8.11 | 0.43 | 0.37 |
| Easy      | O  | 1RLB | -   | 728  | 208  | 7.06 | 8.83 | 0    | 1    |
| Easy      | O  | 1S1Q | -   | 153  | 153  | 4.27 | 5.06 | 0.63 | 0.45 |
| Easy      | O  | 1SBB | -   | -    | -    | -    | -    | -    | -    |
| Easy      | O  | 1T6B | -   | 26   | 26   | 1.98 | 2.61 | 0.96 | 0.34 |
| Easy      | E  | 1TMQ | -   | 1    | 1    | 1.52 | 1.55 | 0.98 | 0.29 |
| Easy      | E  | 1UDI | -   | 1    | 1    | 1.56 | 1.75 | 0.83 | 0.06 |
| Easy      | A  | 1VFB | -   | 24   | 24   | 1.63 | 2.08 | 0.75 | 0.05 |
| Easy      | A  | 1WEJ | -   | 80   | 80   | 3.32 | 5.1  | 0.82 | 0.29 |
| Medium    | O  | 1WQ1 | -   | -    | 36   | 5.12 | 6.05 | 0.4  | 0.5  |
| Easy      | O  | 1XD3 | -   | 1    | 1    | 6.25 | 5.43 | 0.88 | 0.09 |
| Medium    | O  | 1XQS | -   | 20   | 1    | 1.07 | 1.89 | 0    | 1    |
| Difficult | O  | 1Y64 | -   | 2    | 2    | 2.91 | 4.37 | 0.78 | 0.52 |
| Easy      | E  | 1YVB | -   | 1    | 1    | 3.76 | 6.6  | 0.63 | 0.49 |
| Easy      | O  | 1ZHI | 117 | 62   | 62   | 3.57 | 5.72 | 0.93 | 0.36 |
| Easy      | O  | 2AJF | -   | 55   | 55   | 1.14 | 1.46 | 0.85 | 0.18 |
| Easy      | E  | 2B42 | -   | 1    | 1    | 2.84 | 3.66 | 0.78 | 0.22 |
| Easy      | O  | 2BTF | 1   | 1    | 1    | 0.86 | 0.9  | 0.84 | 0.01 |
| Difficult | O  | 2C0L | -   | 2    | 2    | 3.17 | 4.66 | 0.95 | 0.33 |
| Medium    | O  | 2CFH | -   | 1    | 1    | 2.01 | 2.68 | 0.9  | 0.26 |
| Easy      | A  | 2FD6 | -   | 161  | 2    | 7.88 | 8.51 | 0.15 | 0.9  |
| Medium    | O  | 2H7V | -   | 82   | 82   | 1.5  | 2.76 | 0.89 | 0.11 |
| Easy      | O  | 2HLE | -   | 1    | 1    | 3.08 | 6.76 | 0.78 | 0.11 |
| Difficult | AB | 2HMI | -   | 1575 | 1575 | 1.79 | 3.52 | 0.91 | 0.07 |
| Easy      | O  | 2HQS | -   | 1    | 1    | 4.07 | 4.26 | 0.81 | 0.22 |
| Medium    | O  | 2HRK | -   | 19   | 19   | 1.58 | 1.7  | 0.85 | 0.05 |
| Easy      | A  | 2I25 | -   | 1    | 1    | 1.43 | 1.59 | 0.89 | 0.04 |
| Easy      | AB | 2JEL | 32  | 32   | 32   | 0.88 | 1.02 | 0.91 | 0.12 |
| Easy      | E  | 2MTA | -   | 2    | 2    | 1.39 | 2.37 | 0.94 | 0.23 |
| Medium    | O  | 2NZ8 | -   | 1    | 1    | 1.78 | 1.99 | 0.95 | 0.29 |
| Difficult | O  | 2OT3 | -   | 1    | 1    | 1.68 | 1.91 | 0.78 | 0.05 |
| Easy      | E  | 2PCC | -   | 30   | 30   | 9.25 | 8.65 | 0.89 | 0.11 |
| Easy      | AB | 2QFW | -   | 1    | 1    | 1.55 | 2.79 | 0.94 | 0.23 |
| Easy      | E  | 2SIC | -   | 1    | 1    | 1.75 | 2.32 | 0.93 | 0.23 |
| Easy      | E  | 2SNI | -   | 2    | 2    | 3.69 | 5.97 | 0.9  | 0.07 |
| Easy      | E  | 2UUY | -   | -    | -    | -    | -    | -    | -    |
| Easy      | A  | 2VIS | -   | 10   | 10   | 1.73 | 2.99 | 0.83 | 0.14 |
| Easy      | E  | 7CEI | -   | 10   | 10   | 1.71 | 1.89 | 0.82 | 0.19 |

<sup>[a]</sup> Subset of 97 structures from the ZDOCK benchmark 3.0. See footnotes of Table S9 for further explanations.

**Table S11:** Results for unbound global docking with the DrugScore<sup>PP1</sup>/FRODOCK approach.<sup>[a]</sup>

| Difficulty | Category | PDB ID | Quality_1 | Quality_2 | Quality_3 | i_rmsd | l_rmsd | f <sub>nat</sub> | f <sub>not</sub> |
|------------|----------|--------|-----------|-----------|-----------|--------|--------|------------------|------------------|
| Easy       | A        | 1AHW   | -         | -         | 504       | 8.33   | 9.65   | 0.23             | 0.53             |
| Easy       | O        | 1AK4   | -         | -         | -         | -      | -      | -                | -                |
| Easy       | O        | 1AKJ   | -         | -         | 110       | 5.31   | 8.67   | 0.64             | 0.69             |
| Easy       | E        | 1AVX   | -         | 6         | 6         | 1.69   | 3.17   | 0.75             | 0.12             |
| Easy       | E        | 1AY7   | -         | 562       | 322       | 7.69   | 6.55   | 0.17             | 0.84             |
| Easy       | O        | 1B6C   | -         | 43        | 43        | 3.6    | 3.58   | 0.74             | 0.48             |
| Medium     | A        | 1BGX   | -         | -         | -         | -      | -      | -                | -                |
| Easy       | AB       | 1BJ1   | -         | 195       | 195       | 1.79   | 3.29   | 0.79             | 0.06             |
| Difficult  | O        | 1BKD   | -         | -         | 12        | 6.26   | 5.74   | 0.17             | 0.54             |
| Easy       | O        | 1BUH   | -         | -         | 1136      | 5.73   | 6.4    | 0.36             | 0.59             |
| Easy       | A        | 1BVK   | -         | -         | 70        | 7.93   | 8.62   | 0.1              | 0.95             |
| Easy       | E        | 1BVN   | -         | 64        | 64        | 2.21   | 2.36   | 0.62             | 0.14             |
| Easy       | E        | 1CGI   | -         | -         | 162       | 9.7    | 9.11   | 0.13             | 0.78             |
| Easy       | E        | 1D6R   | -         | -         | 79        | 6.4    | 9.62   | 0.33             | 0.68             |
| Difficult  | O        | 1DE4   | -         | -         | -         | -      | -      | -                | -                |
| Easy       | E        | 1DFJ   | -         | -         | 4         | 5.68   | 5.52   | 0.28             | 0.78             |
| Easy       | A        | 1DQJ   | -         | -         | 530       | 5.68   | 7.75   | 0.57             | 0.37             |
| Easy       | A        | 1E6J   | -         | 438       | 438       | 3.46   | 3.13   | 0.69             | 0.6              |
| Easy       | E        | 1EAW   | -         | 1         | 1         | 3.47   | 4.33   | 0.76             | 0.29             |
| Difficult  | O        | 1EER   | -         | -         | 392       | 8.24   | 9.35   | 0.14             | 0.7              |
| Easy       | E        | 1EWY   | -         | 524       | 19        | 7.33   | 7.35   | 0.25             | 0.85             |
| Easy       | E        | 1EZU   | -         | -         | -         | -      | -      | -                | -                |
| Easy       | O        | 1F51   | -         | -         | 207       | 8.38   | 9.27   | 0.14             | 0.82             |
| Easy       | O        | 1FQJ   | -         | -         | 892       | 4.98   | 6.13   | 0.52             | 0.44             |
| Easy       | AB       | 1FSK   | -         | 1         | 1         | 1.61   | 2.03   | 0.96             | 0.24             |
| Easy       | O        | 1GCQ   | -         | -         | 695       | 4.72   | 5.98   | 0.59             | 0.54             |
| Easy       | O        | 1GLA   | -         | -         | -         | -      | -      | -                | -                |
| Easy       | O        | 1GPW   | -         | 120       | 120       | 3.82   | 4.95   | 0.85             | 0.59             |
| Easy       | O        | 1HE1   | -         | -         | 21        | 7.66   | 7.84   | 0.18             | 0.79             |
| Easy       | E        | 1HIA   | -         | -         | 89        | 7.89   | 9.01   | 0.26             | 0.61             |
| Medium     | O        | 1I2M   | -         | -         | 255       | 5.72   | 6      | 0.22             | 0.38             |
| Easy       | O        | 1I4D   | -         | -         | -         | -      | -      | -                | -                |
| Easy       | AB       | 1I9R   | -         | -         | -         | -      | -      | -                | -                |
| Difficult  | O        | 1IBR   | -         | -         | -         | -      | -      | -                | -                |
| Easy       | AB       | 1IQD   | -         | -         | 467       | 5.86   | 9.9    | 0.89             | 0.11             |
| Difficult  | O        | 1IRA   | -         | -         | -         | -      | -      | -                | -                |
| Easy       | A        | 1JPS   | -         | -         | -         | -      | -      | -                | -                |
| Easy       | AB       | 1K4C   | -         | -         | -         | -      | -      | -                | -                |
| Medium     | O        | 1K5D   | -         | -         | 263       | 7.3    | 9.92   | 0.17             | 0.44             |
| Easy       | O        | 1K74   | -         | 311       | 81        | 6.44   | 6.98   | 0.46             | 0.59             |
| Easy       | O        | 1KAC   | -         | 1056      | 383       | 7.86   | 9.33   | 0.19             | 0.86             |
| Medium     | E        | 1KKL   | -         | -         | -         | -      | -      | -                | -                |
| Easy       | O        | 1KTZ   | -         | -         | -         | -      | -      | -                | -                |
| Easy       | O        | 1KXP   | -         | -         | 358       | 6.64   | 6.63   | 0.28             | 0.61             |
| Easy       | AB       | 1KXQ   | -         | -         | 37        | 3.44   | 5.66   | 0.7              | 0.29             |
| Medium     | E        | 1M10   | -         | -         | -         | -      | -      | -                | -                |
| Easy       | E        | 1MAH   | -         | 13        | 13        | 2.7    | 3.49   | 0.81             | 0.39             |
| Easy       | O        | 1ML0   | -         | 39        | 39        | 2.47   | 2.86   | 0.77             | 0.34             |

|           |    |      |   |      |      |      |      |      |      |
|-----------|----|------|---|------|------|------|------|------|------|
| Easy      | A  | 1MLC | - | 23   | 23   | 2.17 | 2.87 | 0.85 | 0.49 |
| Medium    | O  | 1N2C | - | -    | 1724 | 8.64 | 9.98 | 0.2  | 0.54 |
| Easy      | E  | 1N8O | - | 23   | 23   | 4    | 4.9  | 0.6  | 0.2  |
| Easy      | AB | 1NCA | - | 1    | 1    | 3.03 | 4.94 | 0.84 | 0.25 |
| Easy      | AB | 1NSN | - | 650  | 650  | 4.34 | 4.85 | 0.63 | 0.47 |
| Easy      | E  | 1OPH | - | -    | -    | -    | -    | -    | -    |
| Easy      | E  | 1PPE | - | 1    | 1    | 2.41 | 2.55 | 0.86 | 0.27 |
| Difficult | E  | 1PXV | - | -    | -    | -    | -    | -    | -    |
| Easy      | O  | 1QA9 | - | -    | -    | -    | -    | -    | -    |
| Easy      | AB | 1QFW | - | 292  | 292  | 1.72 | 2.03 | 0.91 | 0.18 |
| Easy      | E  | 1R0R | - | 87   | 87   | 1.43 | 1.91 | 0.92 | 0.21 |
| Difficult | O  | 1R8S | - | -    | -    | -    | -    | -    | -    |
| Easy      | O  | 1RLB | - | -    | 387  | 3.43 | 5.17 | 0.7  | 0.34 |
| Easy      | O  | 1S1Q | - | 415  | 70   | 4.68 | 5.33 | 0.65 | 0.6  |
| Easy      | O  | 1SBB | - | -    | -    | -    | -    | -    | -    |
| Easy      | O  | 1T6B | - | -    | 901  | 5.68 | 8.19 | 0.48 | 0.39 |
| Easy      | E  | 1TMQ | - | 1746 | 1746 | 4.14 | 4.62 | 0.51 | 0.46 |
| Easy      | E  | 1UDI | - | -    | 75   | 5.5  | 5.84 | 0.36 | 0.64 |
| Easy      | A  | 1VFB | - | 1024 | 122  | 8.61 | 6.84 | 0.16 | 0.87 |
| Easy      | A  | 1WEJ | - | 649  | 41   | 7.33 | 8.9  | 0.24 | 0.8  |
| Medium    | O  | 1WQ1 | - | -    | 154  | 6.84 | 9.29 | 0.28 | 0.6  |
| Easy      | O  | 1XD3 | - | 1036 | 518  | 8.05 | 9.69 | 0.32 | 0.4  |
| Medium    | O  | 1XQS | - | -    | -    | -    | -    | -    | -    |
| Difficult | O  | 1Y64 | - | -    | -    | -    | -    | -    | -    |
| Easy      | E  | 1YVB | - | 1    | 1    | 2.3  | 4.8  | 0.86 | 0.25 |
| Easy      | O  | 1ZHI | - | -    | 1095 | 7.22 | 9.4  | 0.35 | 0.77 |
| Easy      | O  | 2AJF | - | -    | -    | -    | -    | -    | -    |
| Easy      | E  | 2B42 | - | 30   | 30   | 2.52 | 3.61 | 0.73 | 0.28 |
| Easy      | O  | 2BTF | - | -    | 630  | 9.27 | 9.88 | 0.14 | 0.78 |
| Difficult | O  | 2C0L | - | -    | -    | -    | -    | -    | -    |
| Medium    | O  | 2CFH | - | 178  | 178  | 2.43 | 2.36 | 0.86 | 0.42 |
| Easy      | A  | 2FD6 | - | -    | -    | -    | -    | -    | -    |
| Medium    | O  | 2H7V | - | -    | -    | -    | -    | -    | -    |
| Easy      | O  | 2HLE | - | 1077 | 118  | 6.21 | 7.34 | 0.27 | 0.57 |
| Difficult | AB | 2HMI | - | -    | -    | -    | -    | -    | -    |
| Easy      | O  | 2HQS | - | -    | 163  | 5.12 | 7.51 | 0.52 | 0.52 |
| Medium    | O  | 2HRK | - | -    | -    | -    | -    | -    | -    |
| Easy      | A  | 2I25 | - | -    | -    | -    | -    | -    | -    |
| Easy      | AB | 2JEL | - | -    | 605  | 8.77 | 8.99 | 0.2  | 0.74 |
| Easy      | E  | 2MTA | - | -    | 1080 | 6.59 | 8.23 | 0.17 | 0.86 |
| Medium    | O  | 2NZ8 | - | -    | -    | -    | -    | -    | -    |
| Difficult | O  | 2OT3 | - | -    | -    | -    | -    | -    | -    |
| Easy      | E  | 2PCC | - | -    | 1118 | 7.6  | 9.86 | 0.28 | 0.8  |
| Easy      | AB | 2QFW | - | -    | 12   | 3.51 | 7.01 | 0.81 | 0.29 |
| Easy      | E  | 2SIC | - | 215  | 5    | 4.56 | 6.61 | 0.66 | 0.45 |
| Easy      | E  | 2SNI | - | -    | 63   | 4.88 | 8.63 | 0.51 | 0.32 |
| Easy      | E  | 2UUY | - | -    | -    | -    | -    | -    | -    |
| Easy      | A  | 2VIS | - | 1166 | 95   | 5.45 | 6.22 | 0.42 | 0.54 |
| Easy      | E  | 7CEI | - | -    | 504  | 8.33 | 9.65 | 0.23 | 0.53 |

<sup>[a]</sup> Subset of 97 structures from the ZDOCK benchmark 3.0. See footnotes of Table S9 for further explanations.

**Table S12:** Results for unbound global docking with the FRODOCK approach.<sup>[a]</sup>

| Difficulty | Category | PDB ID | Quality_1 | Quality_2 | Quality_3 | i_rmsd | l_rmsd | f <sub>nat</sub> | f <sub>not</sub> |
|------------|----------|--------|-----------|-----------|-----------|--------|--------|------------------|------------------|
| Easy       | A        | 1AHW   | -         | 288       | 288       | 1.41   | 1.41   | 0.78             | 0.07             |
| Easy       | O        | 1AK4   | -         | -         | -         | -      | -      | -                | -                |
| Easy       | O        | 1AKJ   | -         | 486       | 322       | 8.77   | 8.11   | 0.52             | 0.81             |
| Easy       | E        | 1AVX   | -         | 11        | 10        | 3.53   | 6.24   | 0.65             | 0.22             |
| Easy       | E        | 1AY7   | -         | 1         | 1         | 3.13   | 4.45   | 0.83             | 0.14             |
| Easy       | O        | 1B6C   | -         | 5         | 5         | 3.31   | 3.33   | 0.69             | 0.43             |
| Medium     | A        | 1BGX   | -         | -         | -         | -      | -      | -                | -                |
| Easy       | AB       | 1BJ1   | -         | 49        | 49        | 1.44   | 2.51   | 0.67             | 0.08             |
| Difficult  | O        | 1BKD   | -         | -         | 82        | 6.07   | 5.86   | 0.19             | 0.51             |
| Easy       | O        | 1BUH   | -         | 1688      | 476       | 5.44   | 5.65   | 0.37             | 0.5              |
| Easy       | A        | 1BVK   | -         | 336       | 13        | 7.55   | 8.2    | 0.24             | 0.86             |
| Easy       | E        | 1BVN   | -         | 2         | 2         | 2.22   | 2.36   | 0.62             | 0.21             |
| Easy       | E        | 1CGI   | -         | 38        | 19        | 7.48   | 7.62   | 0.21             | 0.59             |
| Easy       | E        | 1D6R   | -         | -         | 96        | 7.14   | 8.82   | 0.14             | 0.85             |
| Difficult  | O        | 1DE4   | -         | 1597      | 939       | 2.99   | 7.51   | 0.5              | 0.43             |
| Easy       | E        | 1DFJ   | -         | 2         | 1         | 4.88   | 5.7    | 0.66             | 0.57             |
| Easy       | A        | 1DQJ   | -         | -         | -         | -      | -      | -                | -                |
| Easy       | A        | 1E6J   | -         | 17        | 10        | 8.94   | 8.45   | 0.23             | 0.82             |
| Easy       | E        | 1EAW   | -         | 41        | 41        | 3.26   | 4.15   | 0.79             | 0.24             |
| Difficult  | O        | 1EER   | -         | -         | 191       | 7.18   | 8.43   | 0.35             | 0.58             |
| Easy       | E        | 1EWY   | -         | 1         | 1         | 2.65   | 2.55   | 0.61             | 0.48             |
| Easy       | E        | 1EZU   | -         | 197       | 197       | 3.37   | 3.21   | 0.49             | 0.13             |
| Easy       | O        | 1F51   | -         | 83        | 83        | 4.01   | 4.01   | 0.66             | 0.47             |
| Easy       | O        | 1FQJ   | -         | -         | 437       | 4.52   | 5.58   | 0.57             | 0.35             |
| Easy       | AB       | 1FSK   | -         | 1         | 1         | 2.35   | 2.68   | 0.85             | 0.29             |
| Easy       | O        | 1GCQ   | -         | -         | 157       | 6.75   | 7.98   | 0.24             | 0.76             |
| Easy       | O        | 1GLA   | -         | 327       | 327       | 4.36   | 4.72   | 0.68             | 0.42             |
| Easy       | O        | 1GPW   | -         | 1         | 1         | 2.78   | 4.04   | 0.83             | 0.53             |
| Easy       | O        | 1HE1   | -         | -         | 17        | 8.09   | 9.23   | 0.22             | 0.84             |
| Easy       | E        | 1HIA   | -         | -         | 3         | 8.08   | 8.79   | 0.11             | 0.88             |
| Medium     | O        | 1I2M   | -         | -         | 129       | 4.45   | 4.83   | 0.29             | 0.2              |
| Easy       | O        | 1I4D   | -         | -         | -         | -      | -      | -                | -                |
| Easy       | AB       | 1I9R   | -         | -         | -         | -      | -      | -                | -                |
| Difficult  | O        | 1IBR   | -         | -         | -         | -      | -      | -                | -                |
| Easy       | AB       | 1IQD   | -         | 285       | 241       | 6.95   | 7.42   | 0.85             | 0.15             |
| Difficult  | O        | 1IRA   | -         | -         | -         | -      | -      | -                | -                |
| Easy       | A        | 1JPS   | -         | 895       | 562       | 3.8    | 7.89   | 0.57             | 0.57             |
| Easy       | AB       | 1K4C   | -         | -         | -         | -      | -      | -                | -                |
| Medium     | O        | 1K5D   | -         | -         | 1307      | 4.83   | 6.82   | 0.26             | 0.26             |
| Easy       | O        | 1K74   | -         | 214       | 1         | 4.95   | 5.63   | 0.64             | 0.52             |
| Easy       | O        | 1KAC   | -         | 529       | 14        | 5.6    | 8.93   | 0.67             | 0.64             |
| Medium     | E        | 1KKL   | -         | -         | 300       | 6.74   | 7.73   | 0.43             | 0.55             |
| Easy       | O        | 1KTZ   | -         | 557       | 557       | 2.24   | 2.51   | 0.74             | 0.21             |
| Easy       | O        | 1KXP   | -         | 223       | 167       | 4.73   | 7.14   | 0.4              | 0.36             |
| Easy       | AB       | 1KXQ   | -         | 4         | 4         | 2.92   | 3.91   | 0.76             | 0.23             |
| Medium     | E        | 1M10   | -         | -         | 1798      | 6.28   | 8.32   | 0.29             | 0.32             |
| Easy       | E        | 1MAH   | -         | 1         | 1         | 1.8    | 2.29   | 0.79             | 0.26             |
| Easy       | O        | 1ML0   | -         | 10        | 10        | 1.99   | 2.42   | 0.75             | 0.28             |

|           |    |      |   |      |      |      |      |      |      |
|-----------|----|------|---|------|------|------|------|------|------|
| Easy      | A  | 1MLC | - | 46   | 46   | 2.17 | 2.74 | 0.9  | 0.48 |
| Medium    | O  | 1N2C | - | -    | 6    | 7.59 | 9.90 | 0.22 | 0.51 |
| Easy      | E  | 1N8O | - | 101  | 17   | 4.43 | 5.04 | 0.58 | 0.26 |
| Easy      | AB | 1NCA | - | 700  | 700  | 1.9  | 2.56 | 0.68 | 0.11 |
| Easy      | AB | 1NSN | - | 471  | 426  | 5.13 | 5.84 | 0.44 | 0.55 |
| Easy      | E  | 1OPH | - | -    | -    | -    | -    | -    | -    |
| Easy      | E  | 1PPE | - | 1    | 1    | 1.67 | 1.75 | 0.91 | 0.24 |
| Difficult | E  | 1PXV | - | -    | 42   | 7.8  | 6.62 | 0.1  | 0.85 |
| Easy      | O  | 1QA9 | - | -    | -    | -    | -    | -    | -    |
| Easy      | AB | 1QFW | - | 376  | 331  | 5.87 | 9.87 | 0.57 | 0.48 |
| Easy      | E  | 1R0R | - | 29   | 8    | 5.68 | 7.65 | 0.53 | 0.53 |
| Difficult | O  | 1R8S | - | -    | -    | -    | -    | -    | -    |
| Easy      | O  | 1RLB | - | -    | 547  | 4.72 | 8.26 | 0.57 | 0.34 |
| Easy      | O  | 1S1Q | - | 303  | 55   | 5.89 | 7.14 | 0.54 | 0.65 |
| Easy      | O  | 1SBB | - | -    | -    | -    | -    | -    | -    |
| Easy      | O  | 1T6B | - | 886  | 646  | 6.32 | 8.61 | 0.45 | 0.43 |
| Easy      | E  | 1TMQ | - | 22   | 22   | 3.32 | 2.82 | 0.72 | 0.49 |
| Easy      | E  | 1UDI | - | 13   | 1    | 6.75 | 7.08 | 0.35 | 0.62 |
| Easy      | A  | 1VFB | - | 303  | 25   | 6.84 | 7.93 | 0.33 | 0.78 |
| Easy      | A  | 1WEJ | - | 36   | 36   | 2.01 | 2.61 | 0.7  | 0.14 |
| Medium    | O  | 1WQ1 | - | 1630 | 1630 | 3.95 | 4.95 | 0.57 | 0.38 |
| Easy      | O  | 1XD3 | - | 40   | 5    | 5.64 | 6.84 | 0.42 | 0.34 |
| Medium    | O  | 1XQS | - | -    | -    | -    | -    | -    | -    |
| Difficult | O  | 1Y64 | - | -    | -    | -    | -    | -    | -    |
| Easy      | E  | 1YVB | - | 1    | 1    | 2.11 | 2.81 | 0.68 | 0.31 |
| Easy      | O  | 1ZHI | - | 594  | 153  | 4.75 | 8.58 | 0.61 | 0.34 |
| Easy      | O  | 2AJF | - | 621  | 621  | 3.89 | 3.94 | 0.55 | 0.48 |
| Easy      | E  | 2B42 | - | 1712 | 2    | 4.53 | 6.21 | 0.55 | 0.45 |
| Easy      | O  | 2BTF | - | -    | 457  | 5.72 | 6.24 | 0.29 | 0.57 |
| Difficult | O  | 2C0L | - | -    | -    | -    | -    | -    | -    |
| Medium    | O  | 2CFH | - | 6    | 6    | 3.55 | 4.29 | 0.82 | 0.43 |
| Easy      | A  | 2FD6 | - | -    | 560  | 3.93 | 9.01 | 0.51 | 0.47 |
| Medium    | O  | 2H7V | - | -    | 1615 | 6.29 | 8.78 | 0.6  | 0.4  |
| Easy      | O  | 2HLE | - | 13   | 13   | 3.38 | 3.37 | 0.53 | 0.37 |
| Difficult | AB | 2HMI | - | -    | -    | -    | -    | -    | -    |
| Easy      | O  | 2HQS | - | 541  | 59   | 5.11 | 5.65 | 0.47 | 0.61 |
| Medium    | O  | 2HRK | - | -    | 308  | 6.77 | 7.36 | 0.6  | 0.4  |
| Easy      | A  | 2I25 | - | -    | 36   | 6.52 | 8.53 | 0.46 | 0.31 |
| Easy      | AB | 2JEL | - | 164  | 55   | 7.89 | 8.59 | 0.22 | 0.69 |
| Easy      | E  | 2MTA | - | 72   | 20   | 6.66 | 7.46 | 0.38 | 0.75 |
| Medium    | O  | 2NZ8 | - | -    | 30   | 9.59 | 9.62 | 0.13 | 0.89 |
| Difficult | O  | 2OT3 | - | -    | 165  | 9.12 | 8.29 | 0.14 | 0.62 |
| Easy      | E  | 2PCC | - | 734  | 299  | 7.4  | 9.64 | 0.33 | 0.75 |
| Easy      | AB | 2QFW | - | 189  | 113  | 4.19 | 9.27 | 0.69 | 0.35 |
| Easy      | E  | 2SIC | - | 94   | 19   | 3.83 | 5.35 | 0.65 | 0.22 |
| Easy      | E  | 2SNI | - | -    | -    | -    | -    | -    | -    |
| Easy      | E  | 2UUY | - | -    | -    | -    | -    | -    | -    |
| Easy      | A  | 2VIS | - | 465  | 186  | 2.77 | 5.28 | 0.74 | 0.2  |
| Easy      | E  | 7CEI | - | 288  | 288  | 1.41 | 1.41 | 0.78 | 0.07 |

<sup>[a]</sup> Subset of 97 structures from the ZDOCK benchmark 3.0. See footnotes of Table S9 for further explanations.

**Table S13:** Results for unbound knowledge-driven docking with the DrugScore<sup>PPI</sup>/FRODOCK approach.<sup>[a]</sup>

| Difficulty | Category | PDB ID | Quality_1 | Quality_2 | Quality_3 | i_rmsd | L_rmsd | f <sub>nat</sub> | f <sub>not</sub> |
|------------|----------|--------|-----------|-----------|-----------|--------|--------|------------------|------------------|
| Easy       | A        | 1AHW   | -         | -         | 177       | 8.45   | 9.65   | 0.24             | 0.53             |
| Easy       | O        | 1AK4   | -         | -         | -         | -      | -      | -                | -                |
| Easy       | O        | 1AKJ   | -         | -         | 33        | 5.42   | 8.67   | 0.64             | 0.68             |
| Easy       | E        | 1AVX   | -         | 3         | 3         | 1.67   | 3.17   | 0.74             | 0.13             |
| Easy       | E        | 1AY7   | -         | 116       | 54        | 7.76   | 6.55   | 0.18             | 0.83             |
| Easy       | O        | 1B6C   | -         | 5         | 5         | 3.62   | 3.58   | 0.74             | 0.48             |
| Medium     | A        | 1BGX   | -         | -         | -         | -      | -      | -                | -                |
| Easy       | AB       | 1BJ1   | -         | 43        | 43        | 1.83   | 3.29   | 0.79             | 0.07             |
| Difficult  | O        | 1BKD   | -         | -         | -         | -      | -      | -                | -                |
| Easy       | O        | 1BUH   | -         | 772       | 217       | 5.72   | 6.4    | 0.36             | 0.59             |
| Easy       | A        | 1BVK   | -         | 1182      | 16        | 8.03   | 8.62   | 0.13             | 0.92             |
| Easy       | E        | 1BVN   | -         | 21        | 21        | 2.29   | 2.36   | 0.62             | 0.15             |
| Easy       | E        | 1CGI   | -         | -         | 69        | 9.04   | 9.11   | 0.14             | 0.77             |
| Easy       | E        | 1D6R   | -         | -         | 81        | 5.34   | 7.53   | 0.6              | 0.42             |
| Difficult  | O        | 1DE4   | -         | -         | -         | -      | -      | -                | -                |
| Easy       | E        | 1DFJ   | -         | -         | 3         | 5.7    | 5.52   | 0.29             | 0.77             |
| Easy       | A        | 1DQJ   | -         | -         | 78        | 5.7    | 7.75   | 0.56             | 0.38             |
| Easy       | A        | 1E6J   | -         | 21        | 21        | 3.56   | 3.13   | 0.68             | 0.6              |
| Easy       | E        | 1EAW   | -         | 1         | 1         | 3.76   | 4.33   | 0.75             | 0.3              |
| Difficult  | O        | 1EER   | -         | 1999      | 356       | 8.36   | 9.35   | 0.15             | 0.69             |
| Easy       | E        | 1EWY   | -         | 143       | 12        | 7.54   | 7.35   | 0.26             | 0.85             |
| Easy       | E        | 1EZU   | -         | 1993      | 20        | 5.13   | 8.75   | 0.39             | 0.33             |
| Easy       | O        | 1F51   | -         | 627       | 85        | 8.7    | 9.27   | 0.15             | 0.8              |
| Easy       | O        | 1FQJ   | -         | -         | 347       | 5.09   | 6.13   | 0.52             | 0.44             |
| Easy       | AB       | 1FSK   | -         | 1         | 1         | 1.69   | 2.03   | 0.94             | 0.25             |
| Easy       | O        | 1GCQ   | -         | -         | 575       | 4.72   | 5.98   | 0.59             | 0.54             |
| Easy       | O        | 1GLA   | -         | -         | 1645      | 8.61   | 9.25   | 0.31             | 0.63             |
| Easy       | O        | 1GPW   | -         | 44        | 44        | 3.85   | 4.95   | 0.84             | 0.59             |
| Easy       | O        | 1HE1   | -         | 1303      | 5         | 7.67   | 7.84   | 0.19             | 0.78             |
| Easy       | E        | 1HIA   | -         | -         | 19        | 8.05   | 9.01   | 0.27             | 0.6              |
| Medium     | O        | 1I2M   | -         | -         | 81        | 5.93   | 6      | 0.23             | 0.39             |
| Easy       | O        | 1I4D   | -         | -         | -         | -      | -      | -                | -                |
| Easy       | AB       | 1I9R   | -         | -         | -         | -      | -      | -                | -                |
| Difficult  | O        | 1IBR   | -         | -         | -         | -      | -      | -                | -                |
| Easy       | AB       | 1IQD   | -         | -         | 62        | 5.85   | 9.9    | 0.82             | 0.18             |
| Difficult  | O        | 1IRA   | -         | -         | -         | -      | -      | -                | -                |
| Easy       | A        | 1JPS   | -         | 1935      | 1161      | 3.47   | 6.54   | 0.59             | 0.37             |
| Easy       | AB       | 1K4C   | -         | -         | -         | -      | -      | -                | -                |
| Medium     | O        | 1K5D   | -         | -         | 83        | 7.32   | 9.92   | 0.17             | 0.44             |
| Easy       | O        | 1K74   | -         | 76        | 18        | 6.42   | 6.98   | 0.47             | 0.59             |
| Easy       | O        | 1KAC   | -         | 273       | 97        | 8.16   | 9.33   | 0.2              | 0.85             |
| Medium     | E        | 1KKL   | -         | 446       | 70        | 8.22   | 8.43   | 0.1              | 0.91             |
| Easy       | O        | 1KTZ   | -         | 1101      | 580       | 6.66   | 7.46   | 0.58             | 0.49             |
| Easy       | O        | 1KXP   | -         | -         | 112       | 6.68   | 6.63   | 0.29             | 0.61             |
| Easy       | AB       | 1KXQ   | -         | 247       | 4         | 3.45   | 5.66   | 0.7              | 0.3              |
| Medium     | E        | 1M10   | -         | -         | -         | -      | -      | -                | -                |
| Easy       | E        | 1MAH   | -         | 3         | 3         | 2.81   | 3.49   | 0.8              | 0.39             |
| Easy       | O        | 1ML0   | -         | 4         | 4         | 2.48   | 2.86   | 0.76             | 0.35             |

|           |    |      |   |      |      |       |      |      |      |
|-----------|----|------|---|------|------|-------|------|------|------|
| Easy      | A  | 1MLC | - | 1    | 1    | 2.28  | 2.87 | 0.84 | 0.49 |
| Medium    | O  | 1N2C | - | -    | 174  | 8.71  | 9.98 | 0.21 | 0.54 |
| Easy      | E  | 1N8O | - | 12   | 12   | 4.15  | 4.9  | 0.59 | 0.21 |
| Easy      | AB | 1NCA | - | 1    | 1    | 3.17  | 4.94 | 0.83 | 0.26 |
| Easy      | AB | 1NSN | - | 77   | 77   | 4.55  | 4.85 | 0.62 | 0.47 |
| Easy      | E  | 1OPH | - | -    | -    | -     | -    | -    | -    |
| Easy      | E  | 1PPE | - | 1    | 1    | 2.44  | 2.55 | 0.85 | 0.28 |
| Difficult | E  | 1PXV | - | -    | 699  | 7.65  | 8.87 | 0.25 | 0.58 |
| Easy      | O  | 1QA9 | - | -    | -    | -     | -    | -    | -    |
| Easy      | AB | 1QFW | - | 47   | 47   | 1.84  | 2.03 | 0.9  | 0.19 |
| Easy      | E  | 1R0R | - | 30   | 30   | 5.52  | 1.91 | 0.91 | 0.22 |
| Difficult | O  | 1R8S | - | -    | -    | -     | -    | -    | -    |
| Easy      | O  | 1RLB | - | 790  | 52   | 3.54  | 5.17 | 0.69 | 0.35 |
| Easy      | O  | 1S1Q | - | 83   | 12   | 5.53  | 5.33 | 0.65 | 0.6  |
| Easy      | O  | 1SBB | - | -    | -    | -     | -    | -    | -    |
| Easy      | O  | 1T6B | - | 539  | 69   | 6.02  | 8.19 | 0.48 | 0.39 |
| Easy      | E  | 1TMQ | - | 216  | 216  | 4.17  | 4.62 | 0.51 | 0.47 |
| Easy      | E  | 1UDI | - | 1920 | 9    | 5.73  | 5.84 | 0.36 | 0.64 |
| Easy      | A  | 1VFB | - | 335  | 45   | 8.64  | 6.84 | 0.18 | 0.86 |
| Easy      | A  | 1WEJ | - | 67   | 4    | 7.61  | 8.9  | 0.25 | 0.78 |
| Medium    | O  | 1WQ1 | - | -    | 27   | 7.17  | 9.29 | 0.28 | 0.59 |
| Easy      | O  | 1XD3 | - | 151  | 66   | 8.25  | 9.69 | 0.32 | 0.4  |
| Medium    | O  | 1XQS | - | -    | 1261 | 7.43  | 8.81 | 0.22 | 0.53 |
| Difficult | O  | 1Y64 | - | -    | -    | -     | -    | -    | -    |
| Easy      | E  | 1YVB | - | 1    | 1    | 2.31  | 4.8  | 0.85 | 0.25 |
| Easy      | O  | 1ZHI | - | -    | 288  | 7.22  | 9.4  | 0.36 | 0.76 |
| Easy      | O  | 2AJF | - | 521  | 373  | 6.25  | 6.88 | 0.26 | 0.69 |
| Easy      | E  | 2B42 | - | 12   | 12   | 2.63  | 3.61 | 0.73 | 0.28 |
| Easy      | O  | 2BTF | - | -    | 37   | 9.37  | 9.88 | 0.15 | 0.76 |
| Difficult | O  | 2C0L | - | -    | 843  | 9.73  | 9.39 | 0.3  | 0.78 |
| Medium    | O  | 2CFH | - | 59   | 59   | 3.52  | 2.36 | 0.85 | 0.42 |
| Easy      | A  | 2FD6 | - | -    | 714  | 4.18  | 8.55 | 0.45 | 0.54 |
| Medium    | O  | 2H7V | - | -    | 726  | 7.66  | 9.32 | 0.33 | 0.67 |
| Easy      | O  | 2HLE | - | 433  | 59   | 6.24  | 7.34 | 0.28 | 0.57 |
| Difficult | AB | 2HMI | - | -    | -    | -     | -    | -    | -    |
| Easy      | O  | 2HQS | - | 1427 | 54   | 5.14  | 7.51 | 0.52 | 0.52 |
| Medium    | O  | 2HRK | - | -    | 571  | 10.37 | 9.91 | 0.33 | 0.67 |
| Easy      | A  | 2I25 | - | -    | 1095 | 9.17  | 8.07 | 0.28 | 0.46 |
| Easy      | AB | 2JEL | - | -    | 37   | 9.35  | 8.99 | 0.21 | 0.73 |
| Easy      | E  | 2MTA | - | -    | 126  | 6.68  | 8.23 | 0.18 | 0.85 |
| Medium    | O  | 2NZ8 | - | 866  | 678  | 7.79  | 8.97 | 0.26 | 0.67 |
| Difficult | O  | 2OT3 | - | -    | 530  | 6.67  | 9.19 | 0.2  | 0.29 |
| Easy      | E  | 2PCC | - | -    | 96   | 10.02 | 8.42 | 0.12 | 0.94 |
| Easy      | AB | 2QFW | - | 1702 | 8    | 3.67  | 7.01 | 0.8  | 0.29 |
| Easy      | E  | 2SIC | - | 85   | 4    | 4.49  | 6.61 | 0.66 | 0.45 |
| Easy      | E  | 2SNI | - | -    | 35   | 7.5   | 8.63 | 0.51 | 0.32 |
| Easy      | E  | 2UUY | - | -    | -    | -     | -    | -    | -    |
| Easy      | A  | 2VIS | - | 393  | 34   | 5.69  | 6.22 | 0.42 | 0.54 |
| Easy      | E  | 7CEI | - | -    | 177  | 8.45  | 9.65 | 0.24 | 0.53 |



---

<sup>[a]</sup> Subset of 97 structures from the ZDOCK benchmark 3.0. Results from one of the three docking runs (see main text for explanation) are shown only. See footnotes of Table S9 for further explanations.

**Table S14:** Calculation of  $A_{rel}$ .

| PDB ID <sup>[a]</sup> | all rmsd <sup>[b]</sup> | log all rmsd <sup>[c]</sup> | MW <sup>[d]</sup> | $A_s$ <sup>observed</sup> [e] | $A_s$ <sup>predicted</sup> [f] | $A_{rel}$ <sup>[g]</sup> |
|-----------------------|-------------------------|-----------------------------|-------------------|-------------------------------|--------------------------------|--------------------------|
| 1AHW_l                | 1.25                    | 0.10                        | 23005             | 11914                         | 9996                           | 1.19                     |
| 1AHW_r                | 0.75                    | -0.13                       | 46947             | 19131                         | 17190                          | 1.11                     |
| 1AK4_l                | 0.84                    | -0.07                       | 15126             | 8585                          | 7268                           | 1.18                     |
| 1AK4_r                | 0.37                    | -0.43                       | 17887             | 7394                          | 8256                           | 0.90                     |
| 1AKJ_l                | 0.62                    | -0.21                       | 25652             | 10918                         | 10859                          | 1.01                     |
| 1AKJ_r                | 1.13                    | 0.05                        | 43649             | 18692                         | 16264                          | 1.15                     |
| 1AVX_l                | 0.55                    | -0.26                       | 17865             | 8308                          | 8248                           | 1.01                     |
| 1AVX_r                | 0.52                    | -0.28                       | 23483             | 9238                          | 10154                          | 0.91                     |
| 1AY7_l                | 0.68                    | -0.17                       | 10175             | 5016                          | 5377                           | 0.93                     |
| 1AY7_r                | 0.44                    | -0.35                       | 10571             | 5619                          | 5536                           | 1.02                     |
| 1B6C_l                | 0.34                    | -0.47                       | 11824             | 5876                          | 6027                           | 0.97                     |
| 1B6C_r                | 0.94                    | -0.03                       | 37434             | 15518                         | 14472                          | 1.07                     |
| 1BGX_l                | 0.98                    | -0.01                       | 92091             | 36273                         | 28685                          | 1.26                     |
| 1BGX_r                | 1.62                    | 0.21                        | 46611             | 18950                         | 17096                          | 1.11                     |
| 1BJ1_l                | 0.62                    | -0.21                       | 22013             | 11079                         | 9667                           | 1.15                     |
| 1BJ1_r                | -                       | -                           | -                 | -                             | -                              | -                        |
| 1BKD_l                | 1.34                    | 0.13                        | 18833             | 8203                          | 8586                           | 0.96                     |
| 1BKD_r                | 2.11                    | 0.32                        | 54436             | 24586                         | 19236                          | 1.28                     |
| 1BUH_l                | 1.02                    | 0.01                        | 9190              | 5528                          | 4977                           | 1.11                     |
| 1BUH_r                | 0.99                    | -0.01                       | 33490             | 14320                         | 13298                          | 1.08                     |
| 1BVK_l                | 0.70                    | -0.15                       | 14307             | 6307                          | 6967                           | 0.91                     |
| 1BVK_r                | 0.73                    | -0.13                       | 24762             | 10110                         | 10571                          | 0.96                     |
| 1BVN_l                | 0.55                    | -0.26                       | 7959              | 4337                          | 4462                           | 0.97                     |
| 1BVN_r                | 0.47                    | -0.33                       | 55212             | 17440                         | 19444                          | 0.90                     |
| 1CGI_l                | 1.03                    | 0.01                        | 6339              | 4056                          | 3753                           | 1.08                     |
| 1CGI_r                | 0.71                    | -0.15                       | 25672             | 10724                         | 10865                          | 0.99                     |
| 1D6R_l                | 1.05                    | 0.02                        | 6211              | 4287                          | 3695                           | 1.16                     |
| 1D6R_r                | 0.47                    | -0.33                       | 23315             | 9545                          | 10098                          | 0.95                     |
| 1DE4_l                | 0.82                    | -0.09                       | 43032             | 18569                         | 16089                          | 1.15                     |
| 1DE4_r                | 1.21                    | 0.08                        | 143072            | 46707                         | 40093                          | 1.16                     |
| 1DFJ_l                | 0.65                    | -0.19                       | 13699             | 6878                          | 6741                           | 1.02                     |
| 1DFJ_r                | 1.38                    | 0.14                        | 49009             | 18385                         | 17760                          | 1.04                     |
| 1DQJ_l                | 0.69                    | -0.16                       | 14307             | 6306                          | 6967                           | 0.91                     |
| 1DQJ_r                | 0.66                    | -0.18                       | 46107             | 19039                         | 16955                          | 1.12                     |
| 1E6J_l                | 1.48                    | 0.17                        | 8204              | 5021                          | 4566                           | 1.10                     |
| 1E6J_r                | 0.91                    | -0.04                       | 46576             | 19161                         | 17086                          | 1.12                     |
| 1EAW_l                | 0.60                    | -0.22                       | 6524              | 3924                          | 3836                           | 1.02                     |
| 1EAW_r                | 0.47                    | -0.33                       | 26439             | 10633                         | 11111                          | 0.96                     |
| 1EER_l                | 2.38                    | 0.38                        | 45757             | 22573                         | 16857                          | 1.34                     |
| 1EER_r                | 2.78                    | 0.44                        | 18447             | 10312                         | 8452                           | 1.22                     |
| 1EWY_l                | 0.82                    | -0.08                       | 10685             | 5085                          | 5581                           | 0.91                     |
| 1EWY_r                | 3.32                    | 0.52                        | 62754             | 26062                         | 21431                          | 1.22                     |
| 1EZU_l                | 2.15                    | 0.33                        | 32169             | 16220                         | 12897                          | 1.26                     |
| 1EZU_r                | 0.41                    | -0.38                       | 23738             | 9389                          | 10237                          | 0.92                     |
| 1F51_l                | 0.80                    | -0.10                       | 13290             | 6016                          | 6588                           | 0.91                     |
| 1F51_r                | 0.86                    | -0.06                       | 35319             | 16402                         | 13846                          | 1.18                     |
| 1FQJ_l                | 0.91                    | -0.04                       | 15679             | 8722                          | 7470                           | 1.17                     |
| 1FQJ_r                | 0.51                    | -0.30                       | 36206             | 15058                         | 14110                          | 1.07                     |

---

|        |      |       |       |       |       |      |
|--------|------|-------|-------|-------|-------|------|
| 1FSK_l | 0.67 | -0.17 | 17405 | 8654  | 8086  | 1.07 |
| 1FSK_r | -    | -     | -     | -     | -     | -    |
| 1GCQ_l | 0.80 | -0.10 | 24495 | 12638 | 10484 | 1.21 |
| 1GCQ_r | 0.55 | -0.26 | 7740  | 4187  | 4368  | 0.96 |
| 1GLA_l | 0.50 | -0.30 | 15713 | 6479  | 7482  | 0.87 |
| 1GLA_r | 0.54 | -0.27 | 55287 | 18157 | 19464 | 0.93 |
| 1GPW_l | 0.55 | -0.26 | 22339 | 9022  | 9775  | 0.92 |
| 1GPW_r | 0.89 | -0.05 | 27686 | 11152 | 11507 | 0.97 |
| 1HE1_l | 0.59 | -0.23 | 19609 | 9194  | 8853  | 1.04 |
| 1HE1_r | 0.96 | -0.02 | 13889 | 7152  | 6812  | 1.05 |
| 1HIA_l | 2.34 | 0.37  | 5177  | 3990  | 3218  | 1.24 |
| 1HIA_r | 0.53 | -0.27 | 25586 | 10370 | 10837 | 0.96 |
| 1I2M_l | 0.42 | -0.37 | 42788 | 15891 | 16020 | 0.99 |
| 1I2M_r | 1.86 | 0.27  | 22833 | 10397 | 9939  | 1.05 |
| 1I4D_l | 0.68 | -0.17 | 19609 | 9194  | 8853  | 1.04 |
| 1I4D_r | 0.85 | -0.07 | 45682 | 21804 | 16837 | 1.30 |
| 1I9R_l | -    | -     | -     | -     | -     | -    |
| 1I9R_r | 0.77 | -0.12 | 47415 | 16155 | 17320 | 0.93 |
| 1IBR_l | 2.70 | 0.43  | 49107 | 20679 | 17787 | 1.16 |
| 1IBR_r | 1.41 | 0.15  | 20925 | 9732  | 9301  | 1.05 |
| 1IQD_l | 0.35 | -0.46 | 18049 | 8316  | 8313  | 1.00 |
| 1IQD_r | -    | -     | -     | -     | -     | -    |
| 1IRA_l | 0.53 | -0.28 | 16311 | 7909  | 7697  | 1.03 |
| 1IRA_r | 6.01 | 0.78  | 35612 | 16766 | 13933 | 1.20 |
| 1JPS_l | 0.87 | -0.06 | 20831 | 10937 | 9270  | 1.18 |
| 1JPS_r | 0.68 | -0.17 | 46003 | 18834 | 16926 | 1.11 |
| 1K4C_l | 0.60 | -0.22 | 39854 | 17153 | 15178 | 1.13 |
| 1K4C_r | -    | -     | -     | -     | -     | -    |
| 1K5D_l | 0.56 | -0.25 | 38223 | 14480 | 14703 | 0.98 |
| 1K5D_r | 1.44 | 0.16  | 38841 | 16318 | 14884 | 1.10 |
| 1K74_l | 0.77 | -0.11 | 32422 | 14390 | 12974 | 1.11 |
| 1K74_r | 0.57 | -0.24 | 26329 | 11490 | 11076 | 1.04 |
| 1KAC_l | 0.71 | -0.15 | 13397 | 6431  | 6628  | 0.97 |
| 1KAC_r | 0.44 | -0.36 | 19936 | 8607  | 8965  | 0.96 |
| 1KKL_l | 0.55 | -0.26 | 8938  | 4579  | 4873  | 0.94 |
| 1KKL_r | 1.08 | 0.03  | 48858 | 22865 | 17719 | 1.29 |
| 1KTZ_l | 0.38 | -0.42 | 11963 | 6175  | 6081  | 1.02 |
| 1KTZ_r | 1.16 | 0.07  | 12724 | 6975  | 6373  | 1.09 |
| 1KXP_l | 1.85 | 0.27  | 50566 | 23502 | 18188 | 1.29 |
| 1KXP_r | 0.81 | -0.09 | 39636 | 16562 | 15114 | 1.10 |
| 1KXQ_l | -    | -     | -     | -     | -     | -    |
| 1KXQ_r | 0.43 | -0.37 | 55383 | 17407 | 19490 | 0.89 |
| 1M10_l | 0.61 | -0.21 | 29549 | 12817 | 12091 | 1.06 |
| 1M10_r | 0.63 | -0.20 | 23676 | 9910  | 10217 | 0.97 |
| 1MAH_l | 0.88 | -0.06 | 6764  | 4106  | 3943  | 1.04 |
| 1MAH_r | 0.62 | -0.21 | 58791 | 19586 | 20395 | 0.96 |
| 1ML0_l | 1.09 | 0.04  | 8151  | 5508  | 4543  | 1.21 |
| 1ML0_r | 1.52 | 0.18  | 81489 | 31623 | 26139 | 1.21 |
| 1MLC_l | 0.67 | -0.18 | 14307 | 6306  | 6967  | 0.91 |
| 1MLC_r | 0.84 | -0.07 | 46789 | 18995 | 17146 | 1.11 |

---

|        |       |       |        |       |       |      |
|--------|-------|-------|--------|-------|-------|------|
| 1N2C_l | 4.10  | 0.61  | 58716  | 20887 | 20375 | 1.03 |
| 1N2C_r | 0.45  | -0.35 | 224238 | 57197 | 56414 | 1.01 |
| 1N8O_l | 0.69  | -0.16 | 15828  | 8802  | 7523  | 1.17 |
| 1N8O_r | 0.39  | -0.41 | 24830  | 9863  | 10593 | 0.93 |
| 1NCA_l | 0.29  | -0.54 | 43681  | 14481 | 16273 | 0.89 |
| 1NCA_r | -     | -     | -      | -     | -     | -    |
| 1NSN_l | 0.94  | -0.03 | 15505  | 7708  | 7406  | 1.04 |
| 1NSN_r | -     | -     | -      | -     | -     | -    |
| 1OPH_l | 0.30  | -0.52 | 23315  | 9117  | 10098 | 0.90 |
| 1OPH_r | 0.82  | -0.09 | 41913  | 17026 | 15770 | 1.08 |
| 1PPE_l | 0.59  | -0.23 | 3257   | 2630  | 2262  | 1.16 |
| 1PPE_r | 0.40  | -0.40 | 23315  | 9124  | 10098 | 0.90 |
| 1PXV_l | 0.72  | -0.15 | 13063  | 7133  | 6502  | 1.10 |
| 1PXV_r | 0.81  | -0.09 | 19991  | 9086  | 8984  | 1.01 |
| 1QA9_l | 0.80  | -0.10 | 19914  | 9992  | 8958  | 1.12 |
| 1QA9_r | 0.79  | -0.10 | 20604  | 10736 | 9193  | 1.17 |
| 1QFW_l | -     | -     | -      | -     | -     | -    |
| 1QFW_r | 1.26  | 0.10  | 21252  | 11053 | 9412  | 1.17 |
| 1R0R_l | 0.62  | -0.21 | 5580   | 3553  | 3407  | 1.04 |
| 1R0R_r | 0.31  | -0.51 | 27278  | 9826  | 11378 | 0.86 |
| 1R8S_l | 1.12  | 0.05  | 22536  | 11048 | 9841  | 1.12 |
| 1R8S_r | 0.86  | -0.07 | 20484  | 9186  | 9152  | 1.00 |
| 1RLB_l | 0.62  | -0.21 | 20055  | 9681  | 9006  | 1.07 |
| 1RLB_r | 0.74  | -0.13 | 49328  | 19388 | 17848 | 1.09 |
| 1S1Q_l | 0.74  | -0.13 | 7936   | 4280  | 4452  | 0.96 |
| 1S1Q_r | 0.66  | -0.18 | 16418  | 8342  | 7736  | 1.08 |
| 1SBB_l | 0.50  | -0.30 | 28033  | 11668 | 11616 | 1.00 |
| 1SBB_r | 0.82  | -0.08 | 25850  | 12380 | 10922 | 1.13 |
| 1T6B_l | 0.50  | -0.30 | 19821  | 8496  | 8926  | 0.95 |
| 1T6B_r | 1.19  | 0.08  | 74897  | 31161 | 24515 | 1.27 |
| 1TMQ_l | 0.76  | -0.12 | 12686  | 5994  | 6359  | 0.94 |
| 1TMQ_r | 0.37  | -0.44 | 51095  | 15955 | 18332 | 0.87 |
| 1UDI_l | 0.88  | -0.05 | 9334   | 5361  | 5036  | 1.06 |
| 1UDI_r | 0.47  | -0.33 | 25876  | 10713 | 10931 | 0.98 |
| 1VFB_l | 0.60  | -0.22 | 14307  | 6627  | 6967  | 0.95 |
| 1VFB_r | 0.43  | -0.37 | 24700  | 10035 | 10551 | 0.95 |
| 1WEJ_l | 0.44  | -0.36 | 11714  | 6288  | 5985  | 1.05 |
| 1WEJ_r | 0.75  | -0.13 | 47139  | 18785 | 17243 | 1.09 |
| 1WQ1_l | 0.78  | -0.11 | 19490  | 8443  | 8813  | 0.96 |
| 1WQ1_r | 0.85  | -0.07 | 36965  | 16587 | 14334 | 1.16 |
| 1XD3_l | 0.59  | -0.23 | 7936   | 4280  | 4452  | 0.96 |
| 1XD3_r | 0.56  | -0.25 | 23585  | 9734  | 10187 | 0.96 |
| 1XQS_l | 0.65  | -0.19 | 21361  | 10875 | 9449  | 1.15 |
| 1XQS_r | 2.29  | 0.36  | 28343  | 13037 | 11714 | 1.11 |
| 1Y64_l | 0.98  | -0.01 | 40038  | 16078 | 15231 | 1.06 |
| 1Y64_r | 10.45 | 1.02  | 47317  | 25630 | 17293 | 1.48 |
| 1YVB_l | 1.33  | 0.12  | 12192  | 6993  | 6170  | 1.13 |
| 1YVB_r | 0.59  | -0.23 | 27152  | 11055 | 11338 | 0.98 |
| 1ZHI_l | 0.88  | -0.06 | 13302  | 7494  | 6592  | 1.14 |
| 1ZHI_r | 0.72  | -0.14 | 23502  | 12050 | 10160 | 1.19 |

|        |      |       |        |       |       |      |
|--------|------|-------|--------|-------|-------|------|
| 2AJF_l | 0.95 | -0.02 | 20821  | 10317 | 9266  | 1.11 |
| 2AJF_r | 0.47 | -0.33 | 69075  | 25433 | 23053 | 1.10 |
| 2B42_l | 0.54 | -0.27 | 20386  | 7956  | 9119  | 0.87 |
| 2B42_r | 0.42 | -0.37 | 37016  | 15229 | 14349 | 1.06 |
| 2BTF_l | 0.56 | -0.25 | 14930  | 6952  | 7197  | 0.97 |
| 2BTF_r | 1.11 | 0.05  | 39636  | 16563 | 15114 | 1.10 |
| 2C0L_l | 1.23 | 0.09  | 13183  | 6845  | 6547  | 1.05 |
| 2C0L_r | 0.80 | -0.10 | 33183  | 13554 | 13205 | 1.03 |
| 2CFH_l | 1.43 | 0.15  | 16030  | 8103  | 7596  | 1.07 |
| 2CFH_r | 0.64 | -0.19 | 17536  | 8613  | 8133  | 1.06 |
| 2FD6_l | 2.73 | 0.44  | 29526  | 14313 | 12084 | 1.18 |
| 2FD6_r | 1.23 | 0.09  | 46278  | 18855 | 17003 | 1.11 |
| 2H7V_l | 0.67 | -0.17 | 19609  | 9194  | 8853  | 1.04 |
| 2H7V_r | 1.64 | 0.22  | 30882  | 15555 | 12503 | 1.24 |
| 2HLE_l | 0.80 | -0.10 | 15938  | 8214  | 7563  | 1.09 |
| 2HLE_r | 0.72 | -0.15 | 20449  | 9809  | 9140  | 1.07 |
| 2HMI_l | -    | -     | -      | -     | -     | -    |
| 2HMI_r | 3.48 | 0.54  | 113417 | 47483 | 33605 | 1.41 |
| 2HQS_l | 0.52 | -0.28 | 12189  | 5939  | 6168  | 0.96 |
| 2HQS_r | 1.85 | 0.27  | 42119  | 16605 | 15829 | 1.05 |
| 2HRK_l | 0.69 | -0.16 | 11635  | 6332  | 5954  | 1.06 |
| 2HRK_r | 0.63 | -0.20 | 19560  | 9784  | 8837  | 1.11 |
| 2I25_l | 0.48 | -0.32 | 14322  | 6317  | 6973  | 0.91 |
| 2I25_r | 0.49 | -0.31 | 12439  | 6545  | 6264  | 1.04 |
| 2JEL_l | 0.64 | -0.19 | 9119   | 4832  | 4948  | 0.98 |
| 2JEL_r | -    | -     | -      | -     | -     | -    |
| 2MTA_l | 0.38 | -0.42 | 11491  | 5281  | 5898  | 0.90 |
| 2MTA_r | 0.30 | -0.52 | 53042  | 18653 | 18861 | 0.99 |
| 2NZ8_l | 0.99 | 0.00  | 19609  | 9194  | 8853  | 1.04 |
| 2NZ8_r | 1.69 | 0.23  | 35622  | 16417 | 13936 | 1.18 |
| 2OT3_l | 1.26 | 0.10  | 17763  | 8064  | 8212  | 0.98 |
| 2OT3_r | 0.91 | -0.04 | 28536  | 14533 | 11775 | 1.23 |
| 2PCC_l | 0.48 | -0.32 | 12063  | 6395  | 6120  | 1.04 |
| 2PCC_r | 0.34 | -0.47 | 33011  | 12421 | 13153 | 0.94 |
| 2SIC_l | 0.60 | -0.22 | 11044  | 5938  | 5723  | 1.04 |
| 2SIC_r | 0.24 | -0.61 | 27538  | 9891  | 11460 | 0.86 |
| 2SNI_l | 0.49 | -0.31 | 7400   | 4510  | 4221  | 1.07 |
| 2SNI_r | 0.27 | -0.58 | 27453  | 9801  | 11433 | 0.86 |
| 2UUY_l | 1.39 | 0.14  | 6030   | 4230  | 3613  | 1.17 |
| 2UUY_r | 0.27 | -0.56 | 23315  | 9027  | 10098 | 0.89 |
| 2VIS_l | 0.50 | -0.30 | 28952  | 12724 | 11905 | 1.07 |
| 2VIS_r | 5.08 | 0.71  | 46343  | 19411 | 17021 | 1.14 |
| 7CEI_l | 0.66 | -0.18 | 15032  | 7741  | 7234  | 1.07 |
| 7CEI_r | 0.62 | -0.21 | 9887   | 5705  | 5261  | 1.08 |

<sup>[a]</sup> Subset of 88 structures from the ZDOCK benchmark 3.0. “\_r” refers to the receptor protein, “\_l” refers to the ligand protein. “-“ indicates that no unbound structure was given in the dataset.

<sup>[b]</sup> All-atom rmsd. Calculated with PyMol [3].

<sup>[c]</sup> Logarithm of the all-atom rmsd.

<sup>[d]</sup> Molecular weight in kD. Calculated with Maestro [4].

<sup>[e]</sup> Observed solvent accessible surface area, for details see ref. [5]. Calculated with Maestro [4].

<sup>[f]</sup> Predicted solvent accessible surface area calculated as given in eq. 1 from ref. [5].

<sup>[g]</sup> Relative solvent accessible surface area calculated as given in eq. 2 from ref. [5].

## Supplemental Figures

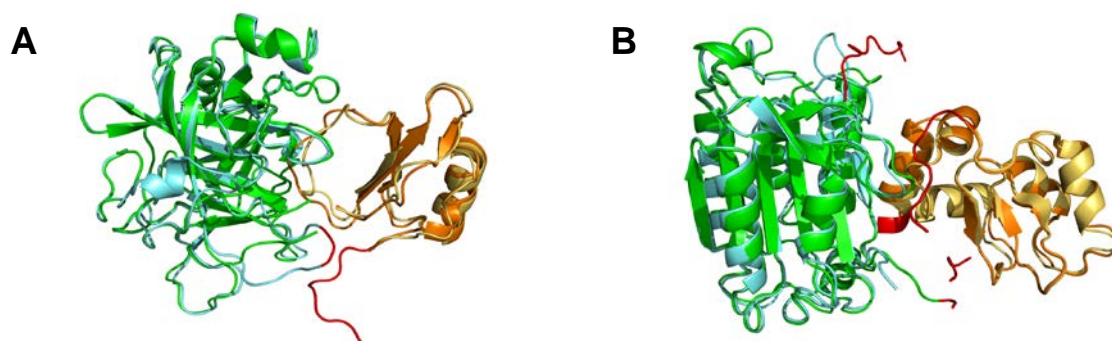

**Figure S1:** Crystal structures of protein-protein complexes where interfaces are incomplete, i.e., residues are missing: (A) Bovine alpha chymotrypsin in complex with eglin c, (B) Caspase-9 in complex with XIAP-BIR3. Depicted are bound and unbound complexes including the bound receptor (green), unbound receptor (cyan), bound ligand (orange), unbound ligand (yellow), and missing (incomplete) interface parts (red), respectively.

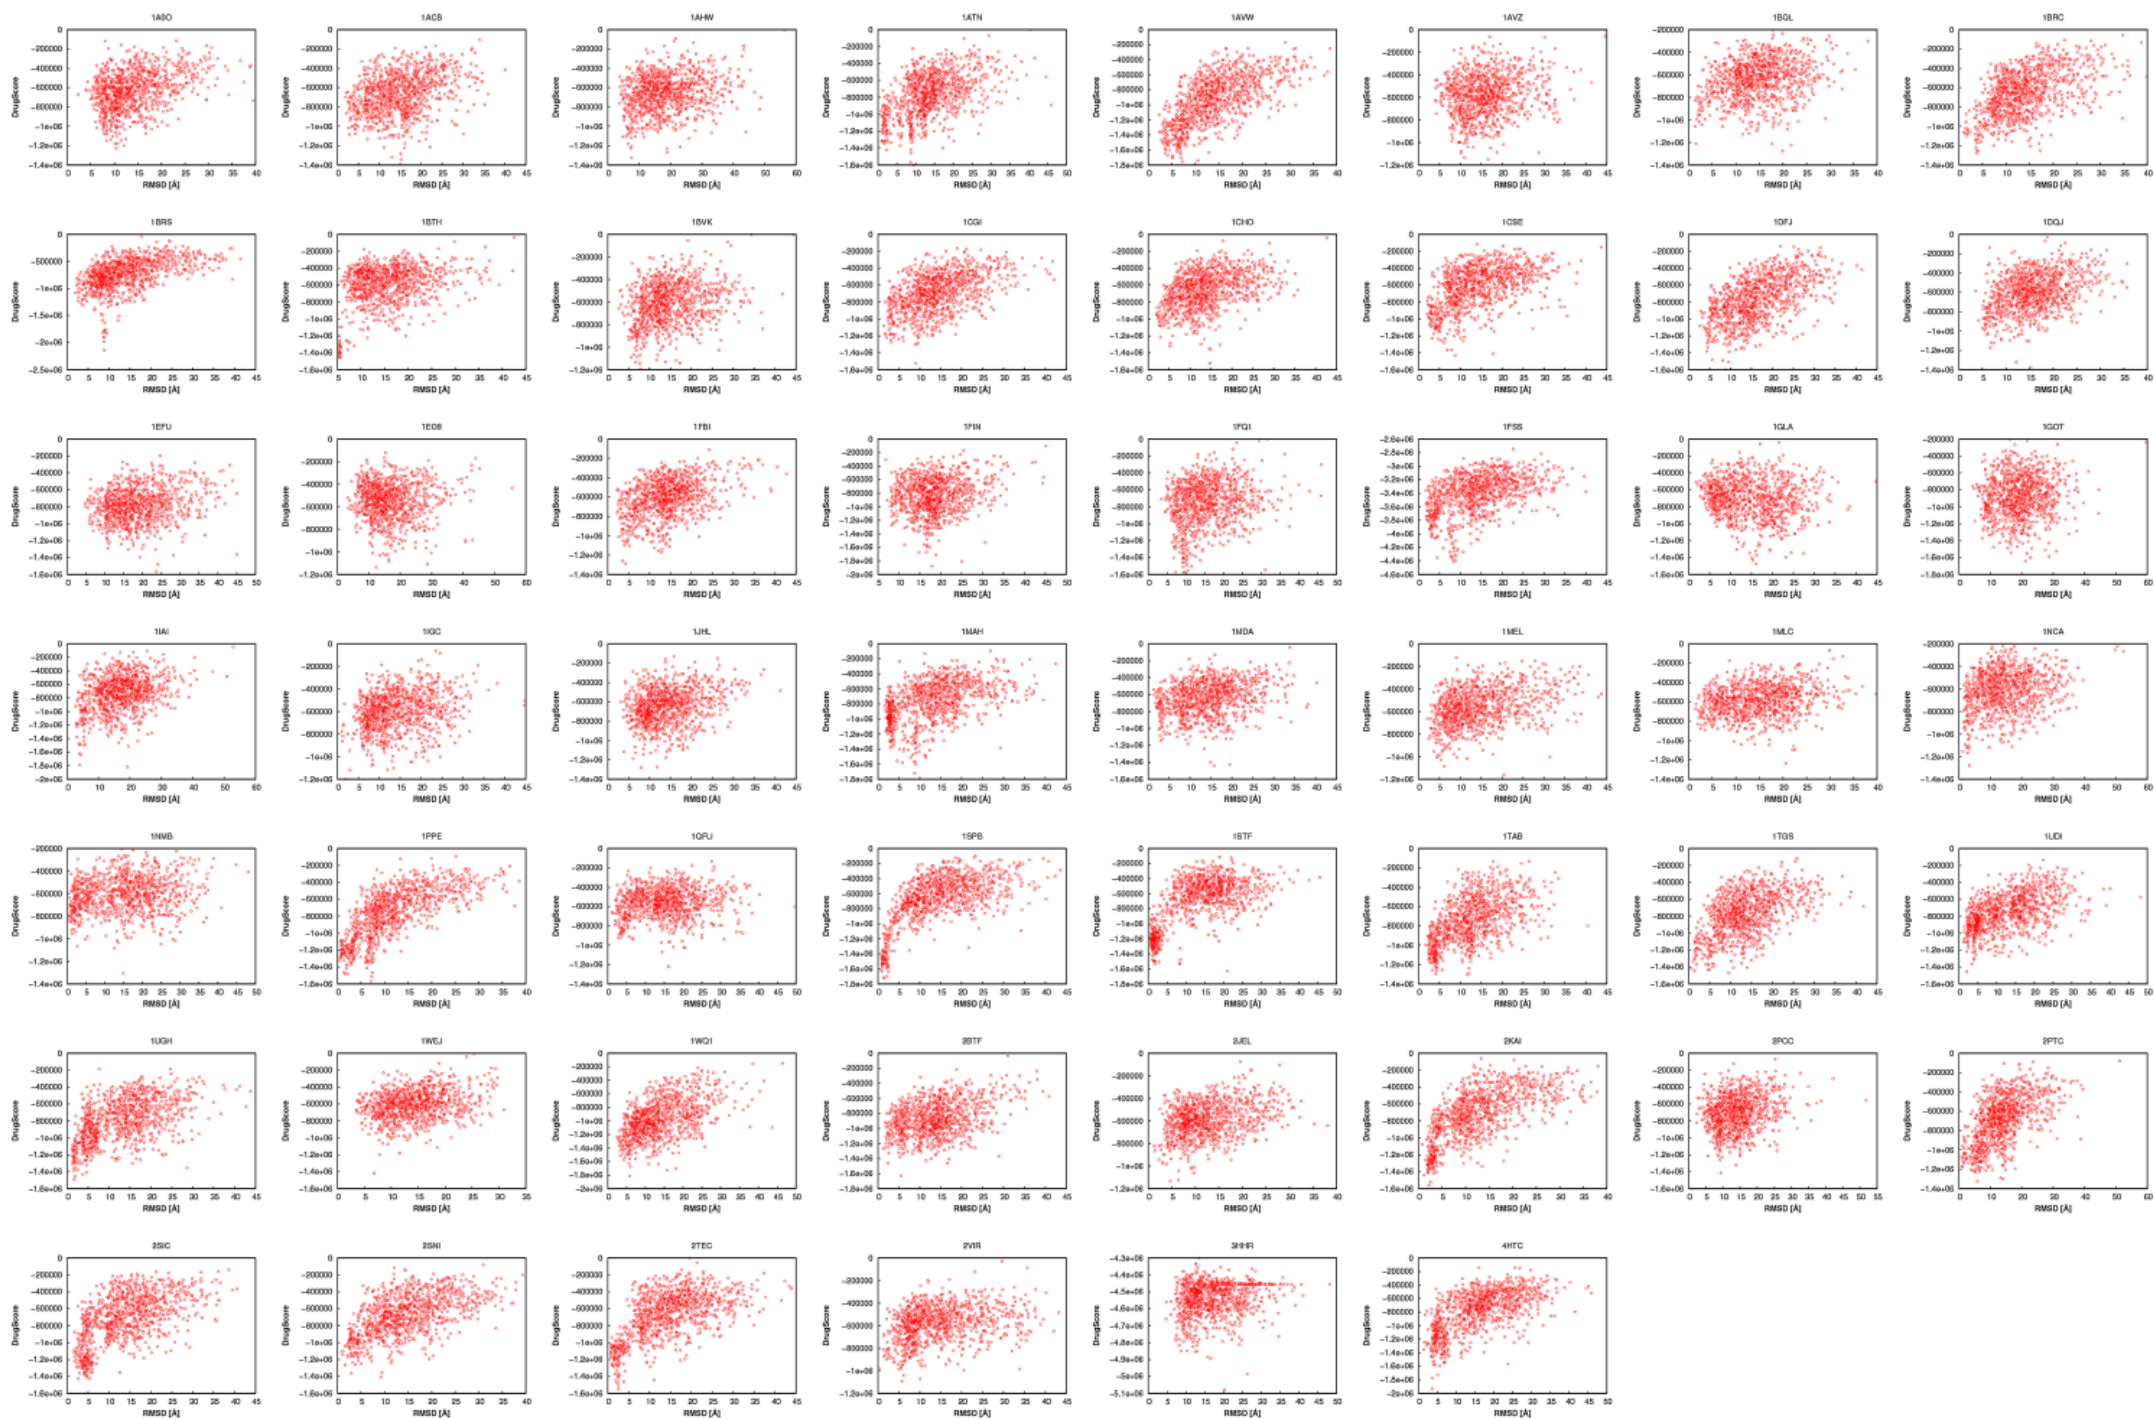

**Figure S2:** Energy landscapes depicting DrugScore<sup>PPI</sup> scores of the decoys of the “unbound perturbation” dataset versus the root mean square deviation of all atoms with respect to the native structure.



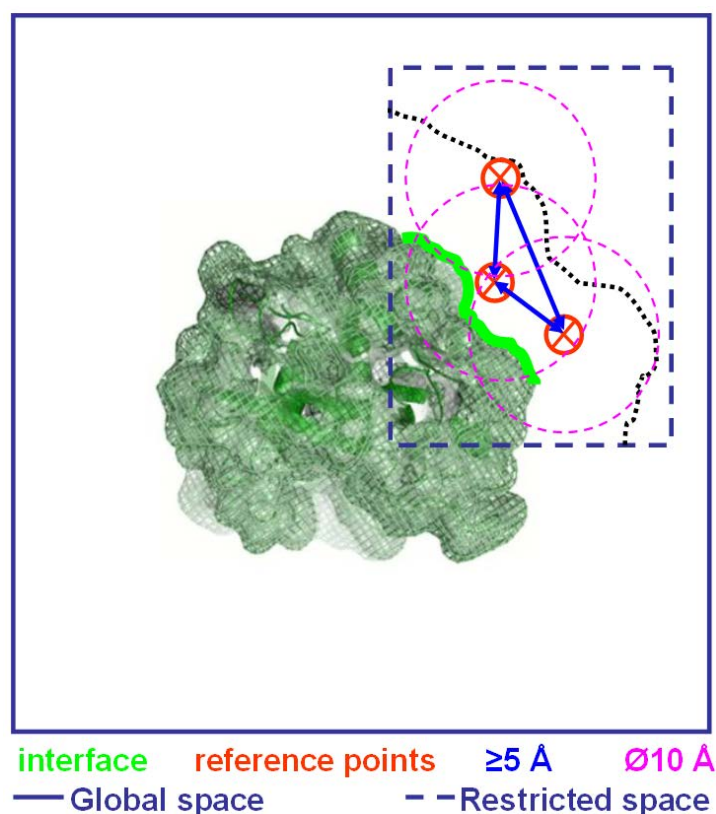

**Figure S3:** Restriction of the ligand search space for knowledge-driven docking (dark blue dashed line) compared to the global search space (dark blue straight line). For this, a reference point (red) within 5 Å distance (black dotted line) of the receptor interface (green line) is chosen. The search space was then restricted to 10 Å around this reference point (magenta). To minimize the bias by the selected reference point on the docking results, each docking run was repeated three times using a randomly selected reference point where each of the points must be at least 5 Å away (blue arrows) from the other two points.

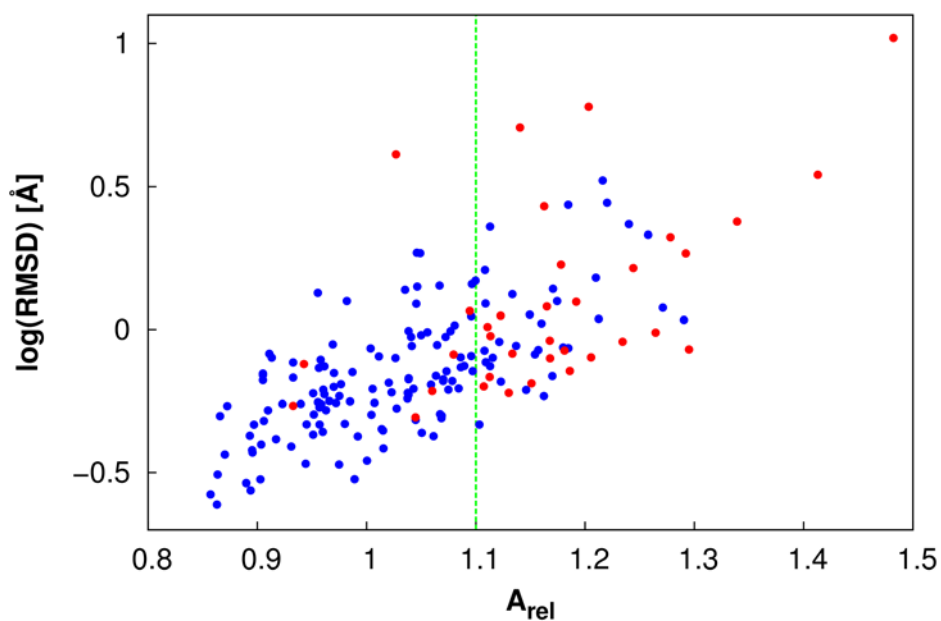

**Figure S4:** Logarithm of the all-atom rmsd versus calculated  $A_{rel}$  (see eq. 2 in ref. [5]) for 88 binding partners in the cleaned version of the ZDOCK benchmark 3.0 where both of the proteins are in the unbound state. The  $\log(\text{rmsd}) \sim A_{rel}$  relation was chosen according to eq. 5 in ref. [5]. Of those unbound knowledge-driven dockings that failed to get a near-native solution with  $i\_rmsd < 10 \text{ \AA}$  in the top 100, the binding partner with the larger  $A_{rel}$  is depicted in red. In 80% of these dockings, at least one of the binding partners had  $A_{rel} > 1.1$  (green dashed line).

|           |      | Actual |     |
|-----------|------|--------|-----|
|           |      | $p$    | $n$ |
| Predicted | $p'$ | 41     | 0   |
|           | $n'$ | 7      | 40  |

**Figure S5:** Confusion matrix for two possible outcomes  $p$  (positive) and  $n$  (negative) for classifying 88 unbound complexes with respect to whether they can be successfully docked with at least acceptable accuracy in the top 100 predictions using as a criterion that both binding partners have  $A_{\text{rel}} < 1.1$ . No. of true positives: 41, no. of false positives: 0, no. of false negatives: 7, no. of true negatives: 40.

---

## Supplemental References

1. Hwang H, Pierce B, Mintseris J, Janin J, Weng Z (2008) Protein-protein docking benchmark version 3.0. *Proteins* 73: 705-709.
2. Gray JJ, Moughon S, Wang C, Schueler-Furman O, Kuhlman B, et al. (2003) Protein-protein docking with simultaneous optimization of rigid-body displacement and side-chain conformations. *J Mol Biol* 331: 281-299.
3. The PyMOL Molecular Graphics System, version 1.5.0.4, Schrödinger, LLC.
4. Maestro, version 9.1, Schrödinger, LLC.
5. Marsh JA, Teichmann SA (2011) Relative solvent accessible surface area predicts protein conformational changes upon binding. *Structure* 19: 859-867.
